# Supplementary material for: Electrosynthesis of S-thiocarbamates with disulfides as a sulfur source
Source: Royal Society of Chemistry journal article supplement (doi:10.1039/d1cc05399j), 2021-12-02

## **Electrosynthesis of *S*-thiocarbamates with disulfides as a sulfur source**

Xiaoying Liu,<sup>a</sup> Tian-Cheng Cai,<sup>a</sup> Dingyi Guo,<sup>a</sup> Zhibin Nong,<sup>a</sup> Yujie Yang,<sup>a</sup> Qiang Li,<sup>ab</sup> Hongmei Jiang,<sup>ac</sup> Xingru Liu,<sup>a</sup> and Qing-Wen Gui<sup>ab\*</sup>

<sup>a</sup>College of Chemistry and Materials Science, Hunan Agricultural University, Changsha 410128, People's Republic of China

<sup>b</sup>College of Agronomy, Hunan Agricultural University, Changsha 410128, People's Republic of China

<sup>c</sup>State Key Laboratory of Chemo/Biosensing and Chemometrics, College of Chemistry and Chemical Engineering, Hunan University, Changsha 410082, People's Republic of China

E-mail: gqw1216@hunau.edu.cn and gqw1216@163.com

### **Table of Content**

|                                                                                    |            |
|------------------------------------------------------------------------------------|------------|
| <b>1. Typical Experimental Procedure</b>                                           | <b>S2</b>  |
| <b>2. Characterization data of products</b>                                        | <b>S6</b>  |
| <b>3. References</b>                                                               | <b>S12</b> |
| <b>4. <sup>1</sup>H, <sup>13</sup>C and <sup>19</sup>F NMR spectra of products</b> | <b>S13</b> |

## 1. Typical Experimental Procedure

### (a) General

All reactions were carried out in Aqueous solvent and commercially available reagents were used as received unless otherwise stated. Analytical thin layer chromatography (TLC) was performed on precoated aluminium-backed silica gel 60 F<sub>254</sub> plates (EMD Millipore, 200  $\mu$ m thickness). TLC plates were visualized with ultraviolet light. Flash column chromatography was performed using Tsingtao silica gel (200-300). <sup>1</sup>H, <sup>13</sup>C and <sup>19</sup>F NMR spectra were recorded on a Bruker Avance DRX - 400 spectrometers; chemical shifts ( $\delta$ ) are given in ppm and calibrated using the signal of residual undeuterated solvent as internal reference (CDCl<sub>3</sub>:  $\delta_{\text{H}}$  = 7.26 ppm and  $\delta_{\text{C}}$  = 77.16 ppm). Data for <sup>1</sup>H NMR, <sup>19</sup>F NMR and <sup>13</sup>C NMR are reported as follows: chemical shift ( $\delta$ , ppm), multiplicity, integration, and coupling constant (Hz). Melting points are uncorrected. The instrument for electrolysis is IKA ElectraSyn 2.0. Cyclic voltammograms were obtained on a Autolab83943 potentiostat. In the characterization data of products of supporting information, the new compounds have been marked with “\*”.

### (b) General procedure for synthesis of compound 3a

Disulfides **1** (0.2 mmol), isocyanides **2** (0.4 mmol), NH<sub>4</sub>I (0.1 M) were placed in a 10 mL vial. The vial was equipped with a condenser, a GC plate (1 cm  $\times$  1 cm) anode and a platinum plate (1 cm  $\times$  1 cm) cathode. 2-MeTHF (3.0 mL) and H<sub>2</sub>O (2.0 mL) were added. The electrolysis was carried out under air atmosphere at rt using a constant current of 7.3 mA until complete consumption of the substrate (monitored by TLC, about 3 h). The mixture was cooled and diluted with brine, and the product was extracted with ethyl acetate (3  $\times$  10 mL). The organic layer was dried with anhydrous Na<sub>2</sub>SO<sub>4</sub> and concentrated under reduced pressure. The residue was chromatographed through silica gel eluting with ethyl acetate/petroleum ether to give the desired products **3**.

### (c) Experimental device

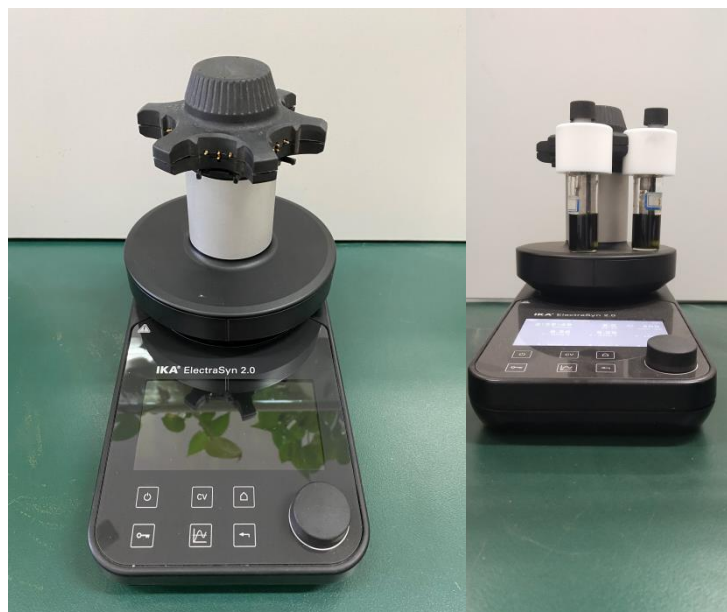

Figure S1. Pictures of the IKA ElectraSyn 2.0 pro Package

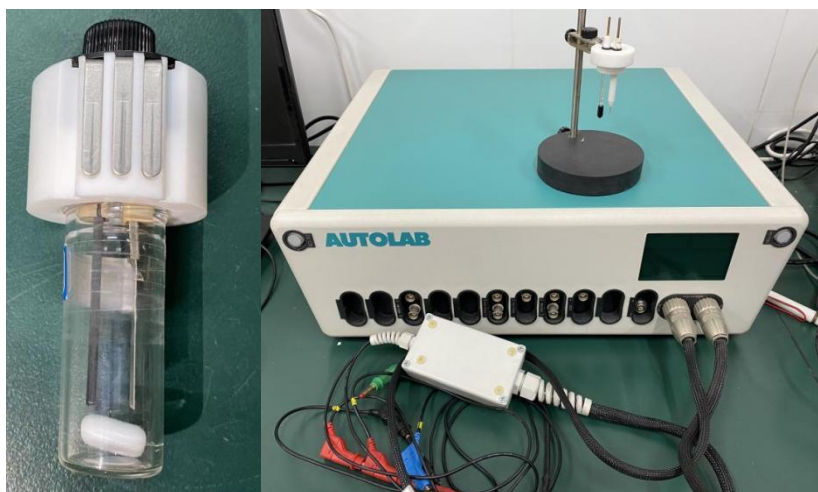

Figure S2. Pictures of Autolab83943 potentiostat. for Cyclic voltammograms

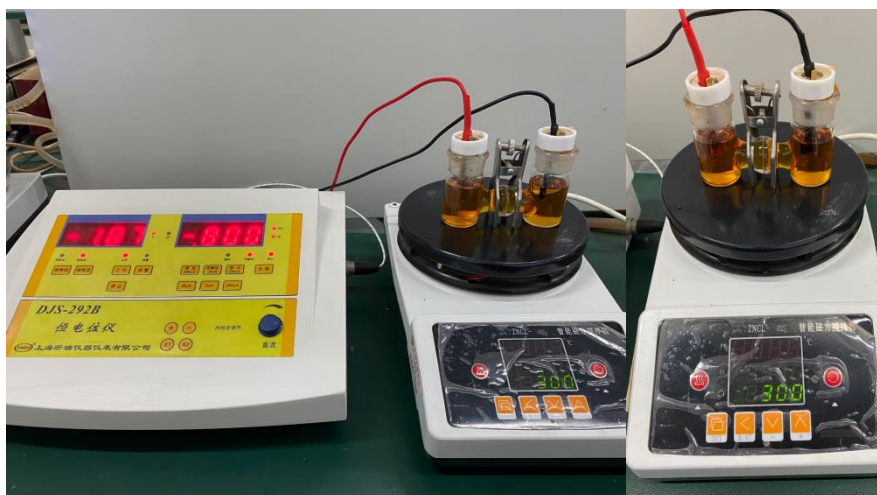

Figure S3. Pictures of the divided cell system

(d) Cyclic Voltammogram Curve

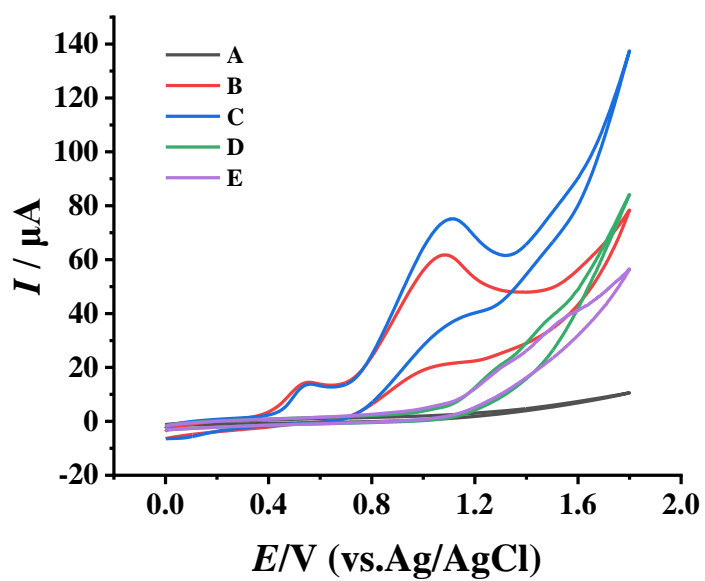

**Figure S4.** Cyclic voltammograms of reactants and their mixtures in 0.1 M LiClO<sub>4</sub>/ 2-MeTHF/H<sub>2</sub>O (3/2 v/v) using a glassy carbon disk working electrode (diameter, 3 mm), Pt disk and Ag/AgCl (0.1 M in CH<sub>3</sub>CN) as counter and reference electrode at 50 mV/s scan rate: A) background, B) NH<sub>4</sub>I (10 mmol/L), C) **1a** (10 mmol/L) and **2a** (20 mmol/L) and NH<sub>4</sub>I (10 mmol/L), D) **1a** (10 mmol/L), E) **2a** (20 mmol/L).

**(e) divided cell experiment**

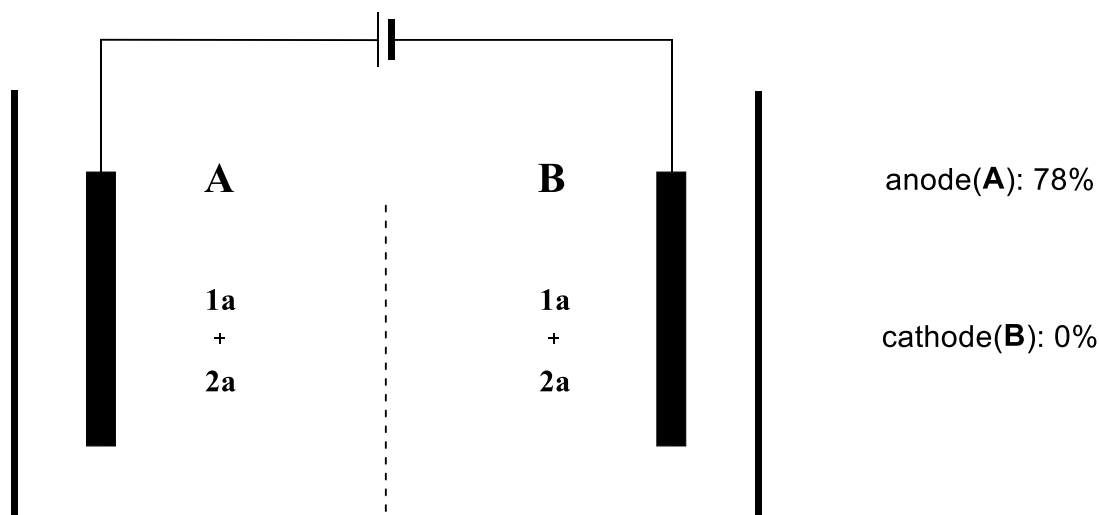

divided cell, GC(+)/Pt(-)  
0.1 M NH<sub>4</sub>I, 2-MeTHF/H<sub>2</sub>O(5 mL, v/v 3:2)  
constant current (8 mA)

The reaction was conducted using an H-type divided cell, and the yields were determined by <sup>1</sup>H NMR.

**(f) The addition of TEMPO in the model reaction system**

Bis[4-(1,1-dimethylethyl)phenyl] disulfide **1a** (0.2 mmol), ethyl isocyanoacetate **2a** (0.4 mmol), NH<sub>4</sub>I (0.1 M) and TEMPO (1.0 equiv.) were placed in a 10 mL vial. The vial was equipped with a condenser, a GC plate (1 cm × 1 cm) anode and a platinum plate (1 cm × 1 cm) cathode. 2-MeTHF (3.0 mL) and H<sub>2</sub>O (2.0 mL) were added. The electrolysis was carried out under air atmosphere at rt using a constant current of 7.3 mA until complete consumption of the substrate (monitored by TLC, about 3 h). The reaction was inhibited, and TEMPO-trapped complex **8** was detected by MS and NMR analysis.

样品信息

```

分析者           : System Administrator
分析日期/时间    : 2021/11/4 18:11:32
样品类型         : 未知
级别号          : 0
样品名           :
样品ID          :
内标量          : [1]=1 [2]=1 [3]=1 [4]=1 [5]=1
样品量          : 1
稀释因子        : 1
样品瓶架号     : 1
样品瓶号       : 81
进样体积       : 10
数据文件        : 1.lcd
方法文件        : MS-200-400.lcm
原始方法文件    : MS-200-400.lcm
报告格式文件    : DEFAULT.lsr
调谐文件        : 20211013.lct
处理者         : System Administrator
处理日期/时间   : 2021/11/4 18:12:33
  
```

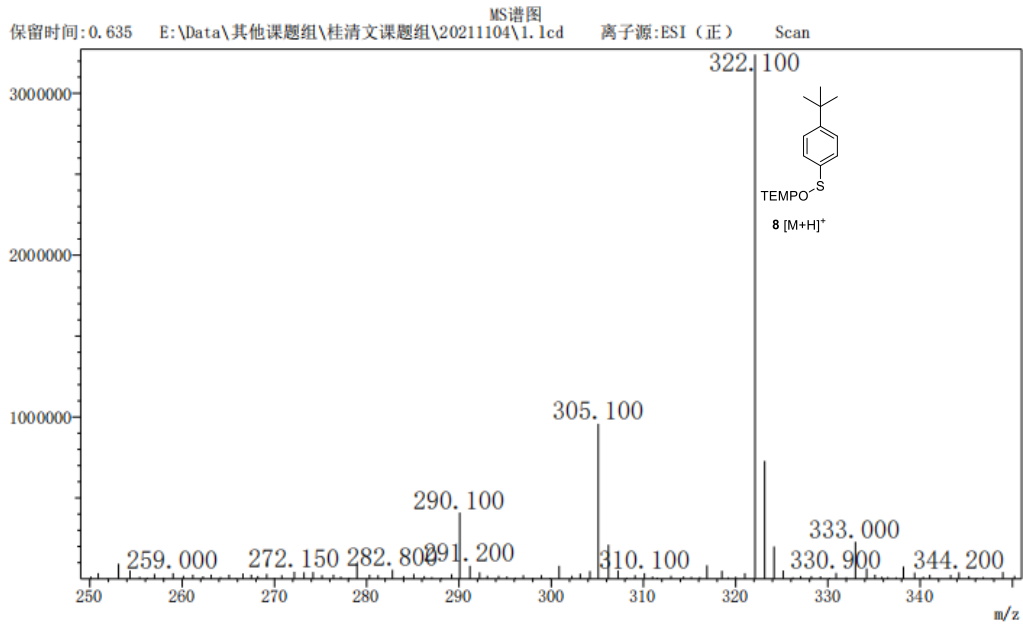

## 2. Characterization data of products

### *ethyl (((4-(tert-butyl)phenyl)thio)carbonyl)glycinate (3a)\**

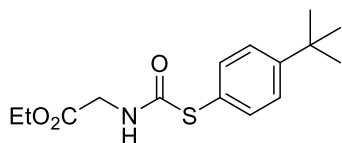

yellow solid, Mp: 60-61 °C; <sup>1</sup>H NMR (400 MHz, CDCl<sub>3</sub>): δ 7.50 (d, *J* = 8.4 Hz, 2 H), 7.44 (d, *J* = 8.4 Hz, 2 H), 5.94 (s, 1 H), 4.22 – 4.16 (m, 2 H), 4.02 (d, *J* = 5.2 Hz, 2 H), 1.32 (s, 9 H), 1.26 (t, *J* = 7.2 Hz, 3 H); <sup>13</sup>C NMR (100 MHz, CDCl<sub>3</sub>): δ 169.4, 167.4, 153.3, 135.3, 126.8, 124.5, 61.7, 42.7, 34.9, 31.2, 14.2; HRMS (ESI) *m/z* calcd. for C<sub>15</sub>H<sub>21</sub>NO<sub>3</sub>S [M+H]<sup>+</sup>: 296.1315, found 296.1322.

### *ethyl ((p-tolylthio)carbonyl)glycinate (3b)<sup>1</sup>*

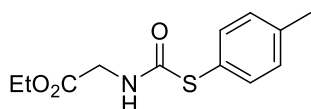

yellow solid, Mp: 60-61 °C; <sup>1</sup>H NMR (400 MHz, CDCl<sub>3</sub>): δ 7.44 (d, *J* = 8.0 Hz, 2 H), 7.21 (d, *J* = 7.6 Hz, 2 H), 6.07 (s, 1 H), 4.16 (q, *J* = 7.2 Hz, 2 H), 3.98 (d, *J* = 5.2 Hz, 2 H), 2.35 (s, 3 H), 1.24 (t, *J* = 7.2 Hz, 3 H); <sup>13</sup>C NMR (100 MHz, CDCl<sub>3</sub>): δ 169.4, 167.4, 140.4, 135.6, 130.4, 124.5, 61.7, 42.7, 21.4, 14.3. MS:*m/z* 253 (M<sup>+</sup>).

### *ethyl ((m-tolylthio)carbonyl)glycinate (3c)<sup>1</sup>*

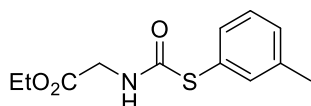

light yellow solid, Mp: 96-97 °C; <sup>1</sup>H NMR (400 MHz, CDCl<sub>3</sub>): δ 7.40 – 7.38 (m, 2 H), 7.32 (t, *J* = 7.6 Hz, 1 H), 7.26 – 7.24 (m, 1 H), 5.95 (s, 1 H), 4.19 (q, *J* = 7.2 Hz, 2 H), 4.02 (d, *J* = 5.2 Hz, 2 H), 2.37 (s, 3 H), 1.26 (t, *J* = 7.2 Hz, 3 H); <sup>13</sup>C NMR (100 MHz, CDCl<sub>3</sub>): δ 169.4, 167.2, 139.7, 136.3, 132.7, 130.9, 129.5, 127.7, 61.8, 42.8, 21.4, 14.2. MS:*m/z* 253 (M<sup>+</sup>).

### *ethyl ((o-tolylthio)carbonyl)glycinate (3d)<sup>1</sup>*

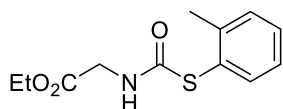

light yellow solid, Mp: 87-88 °C; <sup>1</sup>H NMR (400 MHz, CDCl<sub>3</sub>): δ 7.58 (d, *J* = 7.6 Hz, 1 H), 7.39 – 7.34 (m, 2 H), 7.27 – 7.23 (m, 1 H), 5.85 (s, 1 H), 4.18 (q, *J* = 7.2 Hz, 2 H), 4.00 (d, *J* = 5.2 Hz, 2 H), 2.49 (s, 3 H), 1.25 (t, *J* = 7.2 Hz, 3 H); <sup>13</sup>C NMR (100 MHz, CDCl<sub>3</sub>): δ 169.4, 166.8, 143.2, 137.2, 131.3, 130.9, 127.5, 127.3, 61.8, 42.7, 21.2, 14.2. MS:*m/z* 253 (M<sup>+</sup>).

### *ethyl ((phenylthio)carbonyl)glycinate (3e)<sup>1</sup>*

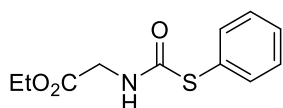

yellow oil; <sup>1</sup>H NMR (400 MHz, CDCl<sub>3</sub>): δ 7.60 – 7.58 (m, 2 H), 7.45 – 7.42 (m, 3 H), 5.90 (s, 1 H), 4.19 (q, *J* = 7.2 Hz, 2 H), 4.03 (d, *J* = 4.8 Hz, 2 H), 1.26 (t, *J* = 7.2 Hz, 3 H); <sup>13</sup>C NMR (100 MHz, CDCl<sub>3</sub>): δ 169.4, 167.0, 135.7, 130.1, 129.7, 128.1, 61.9, 42.8, 14.2. MS:*m/z* 239 (M<sup>+</sup>).

### *ethyl (((4-fluorophenyl)thio)carbonyl)glycinate (3f)<sup>1</sup>*

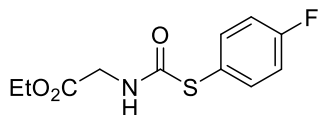

yellow oil;  $^1\text{H NMR}$  (400 MHz,  $\text{CDCl}_3$ ):  $\delta$  7.56 – 7.52 (m, 2 H), 7.11 (t,  $J = 8.8$  Hz, 2 H), 5.96 (s, 1 H), 4.21 (q,  $J = 7.2$  Hz, 2 H), 4.03 (d,  $J = 5.2$  Hz, 2 H), 1.27 (t,  $J = 6.8$  Hz, 3 H);  $^{13}\text{C NMR}$  (100 MHz,  $\text{CDCl}_3$ ):  $\delta$  169.4, 166.7, 163.8 (d,  $J = 250$  Hz), 137.8 (d,  $J = 8$  Hz), 123.3, 116.8 (d,  $J = 21$  Hz), 61.9, 42.8, 14.2;  $^{19}\text{F NMR}$  (376 MHz,  $\text{CDCl}_3$ ):  $\delta$  -110.45. MS:m/z 257 ( $\text{M}^+$ ).

**ethyl (((2-fluorophenyl)thio)carbonylglycinate (3g)\***

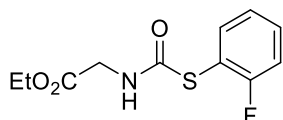

yellow oil;  $^1\text{H NMR}$  (400 MHz,  $\text{CDCl}_3$ ):  $\delta$  7.57 – 7.53 (m, 1 H), 7.48 – 7.42 (m, 1 H), 7.21 – 7.16 (m, 2 H), 6.05 (s, 1 H), 4.22 (q,  $J = 7.2$  Hz, 2 H), 4.05 (d,  $J = 4.8$  Hz, 2 H), 1.28 (t,  $J = 8.2$  Hz, 3 H);  $^{13}\text{C NMR}$  (100 MHz,  $\text{CDCl}_3$ ):  $\delta$  169.3, 164.9, 162.7 (d,  $J = 249$  Hz), 137.7, 132.6 (d,  $J = 8$  Hz), 124.9 (d,  $J = 4$  Hz), 116.5 (d,  $J = 23$  Hz), 61.9, 43.0, 29.8, 14.2;  $^{19}\text{F NMR}$  (376 MHz,  $\text{CDCl}_3$ ):  $\delta$  -105.39; HRMS (ESI) m/z calcd. for  $\text{C}_{11}\text{H}_{12}\text{FNO}_3\text{S}$  [ $\text{M}+\text{H}$ ] $^+$ : 258.0595, found 258.0599.

**ethyl (((4-chlorophenyl)thio)carbonylglycinate (3h)<sup>1</sup>**

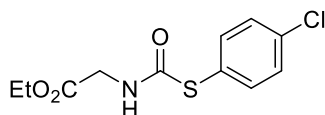

yellow solid, Mp: 72-73 °C;  $^1\text{H NMR}$  (400 MHz,  $\text{CDCl}_3$ ):  $\delta$  7.48 (d,  $J = 8.4$  Hz, 2 H), 7.38 (d,  $J = 8.8$  Hz, 2 H), 5.98 (s, 1 H), 4.21 (q,  $J = 7.2$  Hz, 2 H), 4.04 (d,  $J = 4.8$  Hz, 2 H), 1.28 (t,  $J = 6.8$  Hz, 3 H);  $^{13}\text{C NMR}$  (100 MHz,  $\text{CDCl}_3$ ):  $\delta$  169.4, 166.2, 136.8, 136.4, 129.8, 126.4, 62.0, 42.9, 14.2. MS:m/z 273 ( $\text{M}^+$ ).

**ethyl (((2-chlorophenyl)thio)carbonylglycinate (3i)<sup>1</sup>**

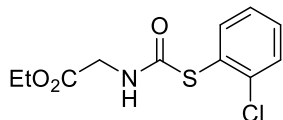

yellow solid, Mp: 77-78 °C;  $^1\text{H NMR}$  (400 MHz,  $\text{CDCl}_3$ ):  $\delta$  7.65 (dd,  $J = 7.6, 1.6$  Hz, 1 H), 7.50 (dd,  $J = 8.0, 1.2$  Hz, 1 H), 7.36 (td,  $J = 7.6, 1.6$  Hz, 1 H), 7.31 – 7.27 (m, 1 H), 6.22 (s, 1 H), 4.27 (q,  $J = 7.2$  Hz, 2 H), 4.03 (d,  $J = 5.2$  Hz, 2 H), 1.30 (t,  $J = 6.8$  Hz, 3 H);  $^{13}\text{C NMR}$  (100 MHz,  $\text{CDCl}_3$ ):  $\delta$  169.3, 164.0, 139.4, 138.0, 131.4, 130.4, 127.6, 127.5, 61.8, 40.9, 14.2. MS:m/z 273 ( $\text{M}^+$ ).

**ethyl (((4-bromophenyl)thio)carbonylglycinate (3j)<sup>1</sup>**

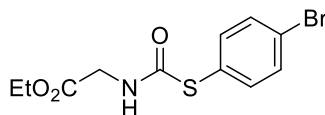

yellow solid, Mp: 54-55 °C;  $^1\text{H NMR}$  (400 MHz,  $\text{CDCl}_3$ ):  $\delta$  7.54 (d,  $J = 8.4$  Hz, 2 H), 7.41 (d,  $J = 8.4$  Hz, 2 H), 5.99 (s, 1 H), 4.21 (q,  $J = 7.2$  Hz, 2 H), 4.04 (d,  $J = 5.2$  Hz, 2 H), 1.27 (t,  $J = 7.2$  Hz, 3 H);  $^{13}\text{C NMR}$  (100 MHz,  $\text{CDCl}_3$ ):  $\delta$  169.4, 166.0, 137.0, 132.7, 127.0, 124.6, 62.0, 42.9, 14.2. MS:m/z 317 ( $\text{M}^+$ ).

**ethyl (((3-bromophenyl)thio)carbonylglycinate (3k)\***

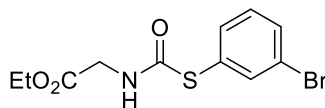

dark black solid, Mp: 51-52 °C; <sup>1</sup>H NMR (400 MHz, CDCl<sub>3</sub>): δ 7.71 (s, 1 H), 7.54 (d, *J* = 7.6 Hz, 1 H), 7.49 (d, *J* = 8.0 Hz, 1 H), 7.28 (t, *J* = 8.0 Hz, 1 H), 6.06 (s, 1 H), 4.21 (q, *J* = 7.6 Hz, 2 H), 4.04 (d, *J* = 4.8 Hz, 2 H), 1.28 (t, *J* = 7.2 Hz, 3 H); <sup>13</sup>C NMR (100 MHz, CDCl<sub>3</sub>): δ 169.3, 165.8, 137.9, 134.0, 132.9, 130.7, 129.9, 122.9, 61.9, 42.9, 14.2; HRMS (ESI) *m/z* calcd. for C<sub>11</sub>H<sub>12</sub>BrNO<sub>3</sub>S [M+H]<sup>+</sup>: 317.9794, found 317.9787.

**ethyl (((2-bromophenyl)thio)carbonyl)glycinate (3l)\***

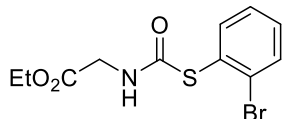

white solid, Mp: 83-84 °C; <sup>1</sup>H NMR (400 MHz, CDCl<sub>3</sub>): δ 7.72 – 7.69 (m, 2 H), 7.36 (td, *J* = 7.6, 1.2 Hz, 1 H), 7.28 (td, *J* = 7.6, 1.6 Hz, 1 H), 6.01 (s, 1 H), 4.21 (q, *J* = 7.2 Hz, 2 H), 4.06 (d, *J* = 5.2 Hz, 2 H), 1.28 (t, *J* = 7.2 Hz, 3 H); <sup>13</sup>C NMR (100 MHz, CDCl<sub>3</sub>): δ 169.3, 165.0, 138.0, 133.9, 131.5, 130.5, 129.7, 128.3, 61.9, 43.0, 14.2; HRMS (ESI) *m/z* calcd. for C<sub>11</sub>H<sub>12</sub>BrNO<sub>3</sub>S [M+H]<sup>+</sup>: 317.9794, found 317.9788.

**ethyl (((2,6-dimethylphenyl)thio)carbonyl)glycinate (3m)\***

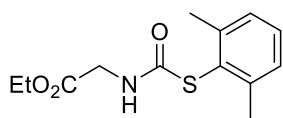

yellow solid, Mp: 67-68 °C; <sup>1</sup>H NMR (400 MHz, CDCl<sub>3</sub>): δ 7.28 – 7.24 (m, 1 H), 7.20 – 7.18 (m, 2 H), 5.78 (s, 1 H), 4.16 (q, *J* = 7.2 Hz, 2 H), 3.97 (d, *J* = 5.2 Hz, 2 H), 2.50 (s, 6 H), 1.24 (t, *J* = 6.8 Hz, 3 H); <sup>13</sup>C NMR (100 MHz, CDCl<sub>3</sub>): δ 169.4, 166.6, 144.0, 130.6, 128.9, 127.4, 61.7, 42.6, 22.2, 14.2; HRMS (ESI) *m/z* calcd. for C<sub>13</sub>H<sub>17</sub>NO<sub>3</sub>S [M+H]<sup>+</sup>: 268.1002, found 268.1015.

**ethyl (((4-hydroxyphenyl)thio)carbonyl)glycinate (3n)\***

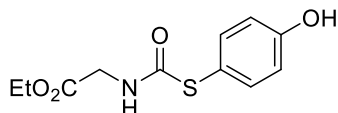

yellow solid, Mp: 83-84 °C; <sup>1</sup>H NMR (400 MHz, CDCl<sub>3</sub>): δ 7.46 (s, 1 H), 7.35 (d, *J* = 7.6 Hz, 2 H), 6.71 (d, *J* = 7.2 Hz, 2 H), 6.21 (s, 1 H), 4.20 (q, *J* = 6.8 Hz, 2 H), 4.05 (d, *J* = 4.8 Hz, 2 H), 1.27 (t, *J* = 6.8 Hz, 3 H); <sup>13</sup>C NMR (100 MHz, CDCl<sub>3</sub>): δ 169.8, 169.8, 158.6, 137.7, 117.1, 116.9, 62.1, 42.9, 14.2; HRMS (ESI) *m/z* calcd. for C<sub>11</sub>H<sub>13</sub>NO<sub>4</sub>S [M+H]<sup>+</sup>: 256.0638, found 256.0644.

**ethyl (((naphthalen-2-ylthio)carbonyl)glycinate (3o)<sup>2</sup>**

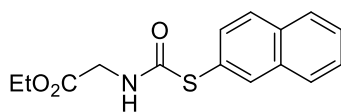

light green solid, Mp: 95-96 °C; <sup>1</sup>H NMR (400 MHz, CDCl<sub>3</sub>): δ 8.12 (s, 1 H), 7.91 – 7.84 (m, 3 H), 7.63 – 7.60 (m, 1 H), 7.58 – 7.51 (m, 2 H), 5.93 (s, 1 H), 4.18 (q, *J* = 7.2 Hz, 2 H), 4.04 (d, *J* = 5.2 Hz, 2 H), 1.25 (t, *J* = 7.2 Hz, 3 H); <sup>13</sup>C NMR (100 MHz, CDCl<sub>3</sub>): δ 169.3, 167.0, 135.8, 133.7, 133.6, 131.8, 129.5, 128.2, 128.0, 127.6, 127.0, 125.3, 61.9, 42.8, 14.2. MS:*m/z* 289 (M<sup>+</sup>).

**ethyl (((thiophen-2-ylthio)carbonyl)glycinate (3p)<sup>2</sup>**

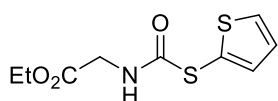

dark and brown oil; <sup>1</sup>H NMR (400 MHz, CDCl<sub>3</sub>): δ 7.60 – 7.58 (m, 1 H), 7.33 – 7.32 (m, 1 H), 7.12 (dd, *J* = 5.2, 3.6 Hz, 1 H), 6.11 (s, 1 H), 4.18 (q, *J* = 7.2 Hz, 2 H), 4.00 (d, *J* = 5.2 Hz, 2 H), 1.25 (t, *J* = 7.2



Hz, 3 H);  $^{13}\text{C}$  NMR (100 MHz,  $\text{CDCl}_3$ ):  $\delta$  169.2, 166.5, 137.9, 133.4, 128.5, 125.5, 61.9, 42.7, 14.2. MS:m/z 245 ( $\text{M}^+$ ).

**ethyl ((benzylthio)carbonyl)glycinate (3q)<sup>1</sup>**

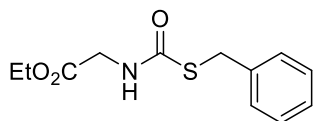

yellow oil;  $^1\text{H}$  NMR (400 MHz,  $\text{CDCl}_3$ ):  $\delta$  7.34 – 7.27 (m, 4 H), 7.25 – 7.22 (m, 1 H), 5.99 (s, 1 H), 4.22 (q,  $J = 7.2$  Hz, 2 H), 4.17 (s, 2 H), 4.07 (d,  $J = 5.2$  Hz, 2 H), 1.28 (t,  $J = 7.2$  Hz, 3 H);  $^{13}\text{C}$  NMR (100 MHz,  $\text{CDCl}_3$ ):  $\delta$  169.5, 167.5, 138.1, 128.9, 128.7, 127.4, 61.9, 42.9, 34.3, 14.3. MS:m/z 253 ( $\text{M}^+$ ).

**ethyl ((phenethylthio)carbonyl)glycinate (3r)<sup>1</sup>**

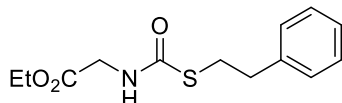

yellow oil;  $^1\text{H}$  NMR (400 MHz,  $\text{CDCl}_3$ ):  $\delta$  7.32 – 7.28 (m, 2 H), 7.23 – 7.20 (m, 3 H), 5.95 (s, 1 H), 4.23 (q,  $J = 7.2$  Hz, 2 H), 4.07 (d,  $J = 5.2$  Hz, 2 H), 3.16 (t,  $J = 7.2$  Hz, 2 H), 2.92 (t,  $J = 8.4$  Hz, 2 H), 1.29 (t,  $J = 7.2$  Hz, 3 H);  $^{13}\text{C}$  NMR (100 MHz,  $\text{CDCl}_3$ ):  $\delta$  169.6, 167.8, 140.2, 128.8, 128.6, 126.6, 61.9, 42.8, 36.8, 31.5, 14.3. MS:m/z 267 ( $\text{M}^+$ ).

**ethyl ((propylthio)carbonyl)glycinate (3s)\***

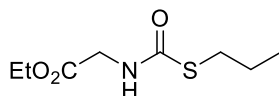

dark and brown oil;  $^1\text{H}$  NMR (400 MHz,  $\text{CDCl}_3$ ):  $\delta$  6.20 (s, 1 H), 4.17 (q,  $J = 7.2$  Hz, 2 H), 4.05 (d,  $J = 5.2$  Hz, 2 H), 2.84 (t,  $J = 7.2$  Hz, 2 H), 1.58 (q,  $J = 7.2$  Hz, 2 H), 1.23 (t,  $J = 7.2$  Hz, 3 H), 0.918 (t,  $J = 7.2$  Hz, 3 H);  $^{13}\text{C}$  NMR (100 MHz,  $\text{CDCl}_3$ ):  $\delta$  169.7, 168.3, 61.7, 42.7, 31.9, 23.7, 14.1, 13.2; HRMS (ESI) m/z calcd. for  $\text{C}_8\text{H}_{15}\text{NO}_3\text{S}$  [ $\text{M}+\text{H}$ ] $^+$ : 206.0845, found 206.0852.

**methyl (((4-(tert-butyl)phenyl)thio)carbonyl)glycinate (3t)\***

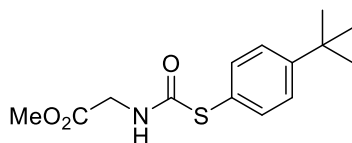

Light yellow solid, Mp: 76-77 °C;  $^1\text{H}$  NMR (400 MHz,  $\text{CDCl}_3$ ):  $\delta$  7.51 – 7.49 (m, 2 H), 7.45 – 7.43 (m, 2 H), 5.90 (s, 1 H), 4.04 (d,  $J = 5.2$  Hz, 2 H), 3.74 (s, 3 H), 1.33 (s, 9 H);  $^{13}\text{C}$  NMR (100 MHz,  $\text{CDCl}_3$ ):  $\delta$  169.9, 167.5, 153.5, 135.4, 126.9, 124.5, 54.6, 42.6, 35.0, 31.3; HRMS (ESI) m/z calcd. for  $\text{C}_{14}\text{H}_{19}\text{NO}_3\text{S}$  [ $\text{M}+\text{H}$ ] $^+$ : 282.1158, found 282.1165.

**S-(4-(tert-butyl)phenyl) cyclohexylcarbamothioate (3u)<sup>4</sup>**

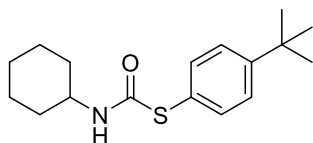

yellow solid, Mp: 53-54 °C;  $^1\text{H}$  NMR (400 MHz,  $\text{CDCl}_3$ ):  $\delta$  7.47 (d,  $J = 8.4$  Hz, 2 H), 7.42 (d,  $J = 8.4$  Hz, 2 H), 5.26 (s, 1 H), 3.73 (s, 1 H), 1.88 – 1.86 (m, 2 H), 1.67 – 1.54 (m, 4 H), 1.32 (s, 9 H), 1.17 –

1.09 (m, 4 H);  $^{13}\text{C}$  NMR (100 MHz,  $\text{CDCl}_3$ ):  $\delta$  165.5, 153.0, 135.2, 126.6, 50.5, 34.9, 32.9, 31.4, 31.3, 25.5, 24.6. MS:m/z 291 ( $\text{M}^+$ ).

***S*-(4-(*tert*-butyl)phenyl) *tert*-butylcarbamothioate (3v)<sup>3</sup>**

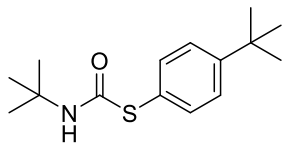

Light yellow solid, Mp: 99-100 °C;  $^1\text{H}$  NMR (400 MHz,  $\text{CDCl}_3$ ):  $\delta$  7.44 (dd,  $J = 16.0, 8.8$  Hz, 4 H), 5.20 (s, 1 H), 1.32 (s, 9 H), 1.31 (s, 9 H);  $^{13}\text{C}$  NMR (100 MHz,  $\text{CDCl}_3$ ):  $\delta$  164.6, 152.7, 135.2, 126.5, 125.6, 53.5, 34.9, 31.3, 29.0. MS:m/z 265 ( $\text{M}^+$ ).

***S*-(4-(*tert*-butyl)phenyl) (2,4,4-trimethylpentan-2-yl)carbamothioate (3w)\***

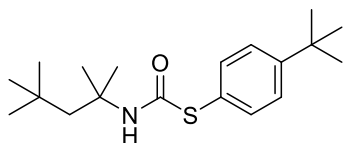

light yellow oil;  $^1\text{H}$  NMR (400 MHz,  $\text{CDCl}_3$ ):  $\delta$  7.44 (q,  $J = 8.8$  Hz, 4 H), 5.20 (s, 1 H), 1.61 (s, 2 H), 1.36 (s, 6 H), 1.31 (s, 9 H), 0.92 (s, 9 H);  $^{13}\text{C}$  NMR (100 MHz,  $\text{CDCl}_3$ ):  $\delta$  163.4, 151.8, 134.3, 125.5, 124.7, 56.2, 51.1, 33.7, 30.5, 30.3, 30.2, 28.0; HRMS (ESI) m/z calcd. for  $\text{C}_{19}\text{H}_{31}\text{NOS}$  [ $\text{M}+\text{H}$ ]<sup>+</sup>: 322.2199, found 322.2204.

***S*-(4-(*tert*-butyl)phenyl) benzylcarbamothioate (3x)\***

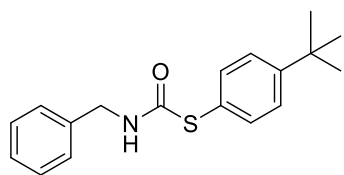

light yellow oil;  $^1\text{H}$  NMR (500 MHz,  $\text{CDCl}_3$ ):  $\delta$  7.48 (d,  $J = 8.5$  Hz, 2 H), 7.41 (d,  $J = 8.5$  Hz, 2 H), 7.33 – 7.30 (m, 2 H), 7.27 – 7.25 (m, 1 H), 7.22 – 7.21 (m, 2 H), 5.65 (s, 1 H), 4.44 (d,  $J = 6.0$  Hz, 2 H), 1.30 (s, 9 H);  $^{13}\text{C}$  NMR (125 MHz,  $\text{CDCl}_3$ ):  $\delta$  166.9, 153.3, 137.8, 135.4, 128.9, 127.8, 127.7, 126.8, 125.0, 45.4, 34.9, 31.3; HRMS (ESI) m/z calcd. for  $\text{C}_{19}\text{H}_{31}\text{NOS}$  [ $\text{M}+\text{H}$ ]<sup>+</sup>: 300.1344, found 300.1352.

***S*-(4-(*tert*-butyl)phenyl) naphthalen-2-ylcarbamothioate (3y)\***

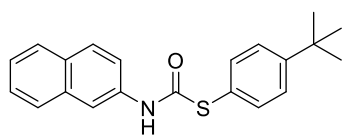

light yellow oil;  $^1\text{H}$  NMR (500 MHz,  $\text{CDCl}_3$ ):  $\delta$  8.05 (s, 1 H), 7.76 – 7.71 (m, 3 H), 7.55 (d,  $J = 8.0$  Hz, 2 H), 7.48 (d,  $J = 8.0$  Hz, 2 H), 7.45 – 7.37 (m, 2 H), 7.30 – 7.25 (m, 2 H), 1.34 (s, 9 H);  $^{13}\text{C}$  NMR (125 MHz,  $\text{CDCl}_3$ ):  $\delta$  165.1, 153.6, 135.5, 135.1, 133.9, 130.8, 129.0, 127.8, 127.7, 126.9, 126.8, 125.3, 124.6, 119.5, 116.6, 35.0, 31.3; HRMS (ESI) m/z calcd. for  $\text{C}_{19}\text{H}_{31}\text{NOS}$  [ $\text{M}+\text{H}$ ]<sup>+</sup>: 336.1334, found 336.1341.

***ethyl* 2-(2,4-dioxo-2*H*-benzo[e][1,3]thiazin-3(4*H*)-yl)acetate (7)\***

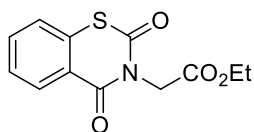

red oil;  $^1\text{H}$  NMR (400 MHz,  $\text{CDCl}_3$ ):  $\delta$  8.37 (d,  $J = 8.8$  Hz, 1 H), 7.63 (t,  $J = 6.8$  Hz, 1 H), 7.44 (t,  $J = 8.0$  Hz, 1 H), 7.33 (d,  $J = 8.0$  Hz, 1 H), 4.88 (s, 2 H), 4.23 (q,  $J = 7.2$  Hz, 2 H), 1.28 (t,  $J = 7.2$  Hz, 3 H);  $^{13}\text{C}$  NMR (100 MHz,  $\text{CDCl}_3$ ):  $\delta$  167.4, 164.5, 163.0, 134.4, 132.3, 131.9, 127.6, 124.8, 122.4, 61.9, 43.0, 14.2; HRMS (ESI)  $m/z$  calcd. for  $\text{C}_{12}\text{H}_{11}\text{NO}_4\text{S}$   $[\text{M}+\text{H}]^+$ : 266.0482, found 266.0495.

**1-(((4-(tert-butyl)phenyl)thio)oxy)-2,2,6,6-tetramethylpiperidine (8)<sup>5</sup>**

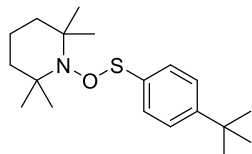

red oil;  $^1\text{H}$  NMR (400 MHz,  $\text{CDCl}_3$ ):  $\delta$  7.60 (d,  $J = 8.4$  Hz, 2 H), 7.47 (d,  $J = 8.4$  Hz, 2 H), 1.67 – 1.51 (m, 15 H), 1.35 (s, 9 H), 0.99 – 0.91 (m, 3 H);  $^{13}\text{C}$  NMR (100 MHz,  $\text{CDCl}_3$ ):  $\delta$  152.4, 146.8, 125.5, 125.3, 60.9, 58.4, 43.3, 41.2, 35.1, 34.5, 32.3, 31.1, 28.5, 27.74, 17.1.

### 3. References

1. W. Wei.; P.-L. Bao.; H.-L. Yue.; S.-T. Liu.; L.-L. Wang.; Y.-D. Li.; D.-S. Yang., *Org. Lett.* **2018**, *20*, 5291–5295.
2. P.-L. Bao.; L.-L. Wang.; H.-L. Yue.; Y. Shao.; J.-W. Wen.; D.-S. Yang.; X.-H. Zhao.; H. Wang.; W. Wei., *J. Org. Chem.* **2019**, *84*, 2976–2983.
3. W.-H. Bao.; Z. Wang.; X. Tang.; Y.-F. Zhang.; J.-X. Tan.; Q. Zhu.; Z. Cao.; Y.-W. Lin.; W.-M. He., *Chin. Chem. Lett.* **2019**, *30*, 2259-2262.
4. W.-H. Bao.; C. Wu.; J.-T. Wang.; W. Xia.; P. Chen.; Z.-L. Tang.; X.-H. Xu.; W.-M. He., *Org. Biomol. Chem.* **2018**, *16*, 7025.
5. W.-K. Yuan.; J. Huang.; X. Xu.; L. Wang.; X.-Y. Tang., *Org. Lett.* **2021**, *23*, 18, 7139-7143.

## 4. $^1\text{H}$ , $^{13}\text{C}$ and $^{19}\text{F}$ NMR spectra of products

*ethyl ((4-(tert-butyl)phenyl)thio)carbonyl)glycinate (3a)*

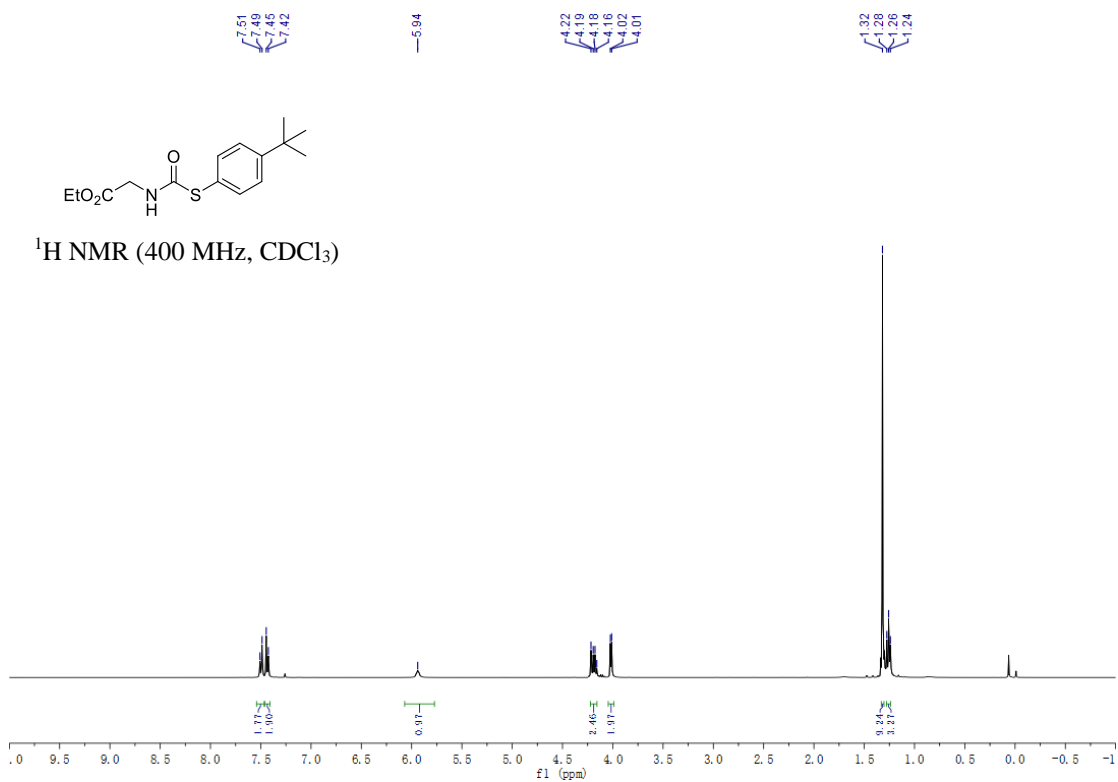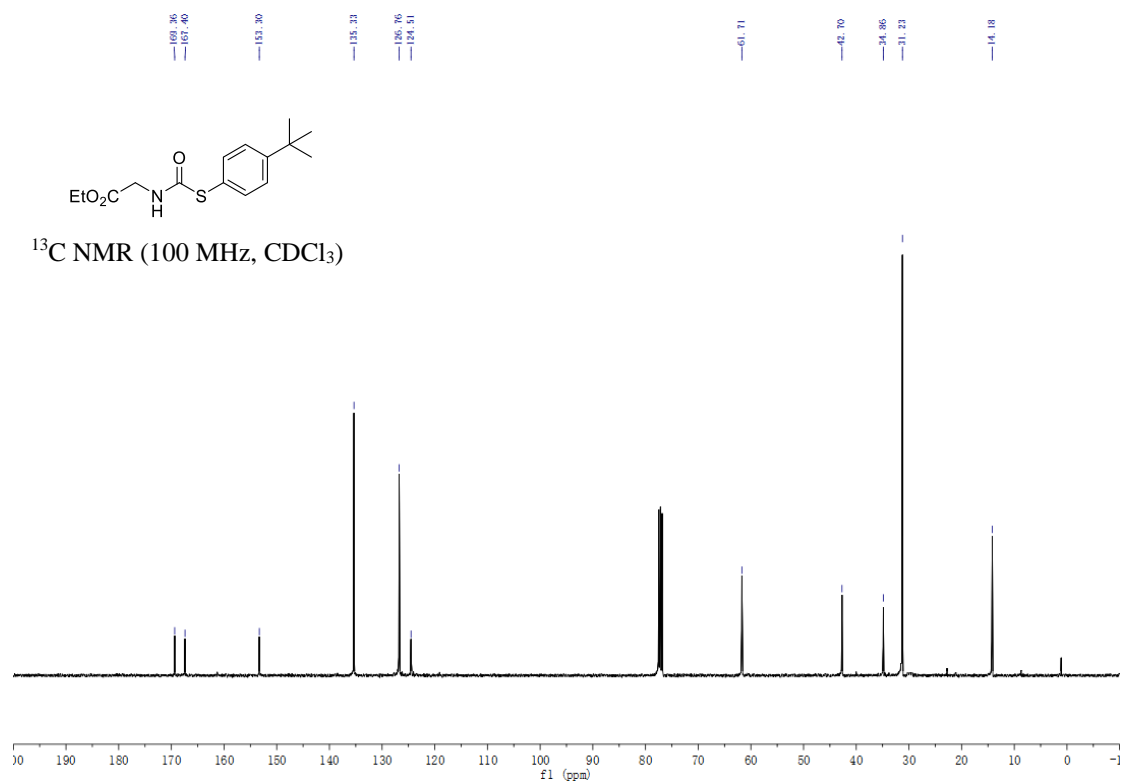

ethyl ((p-tolylthio)carbonyl)glycinate (3b)

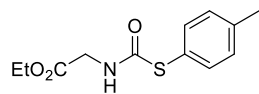

$^1\text{H}$  NMR (400 MHz,  $\text{CDCl}_3$ )

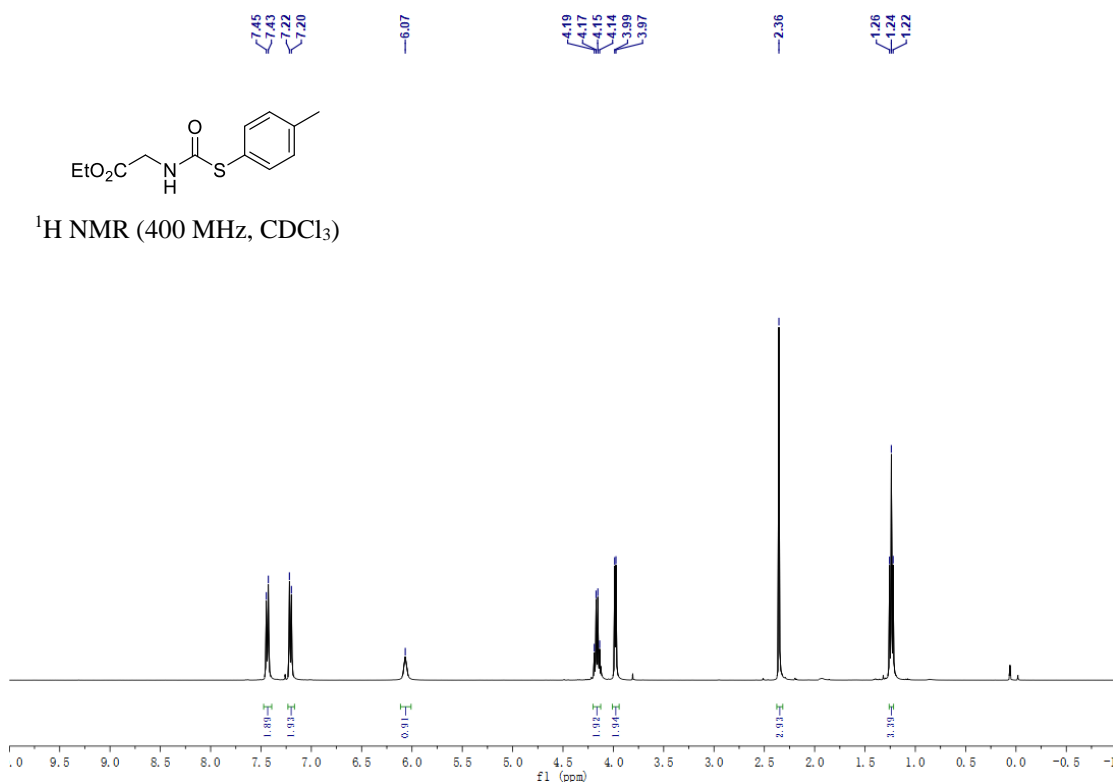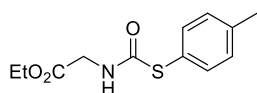

$^{13}\text{C}$  NMR (100 MHz,  $\text{CDCl}_3$ )

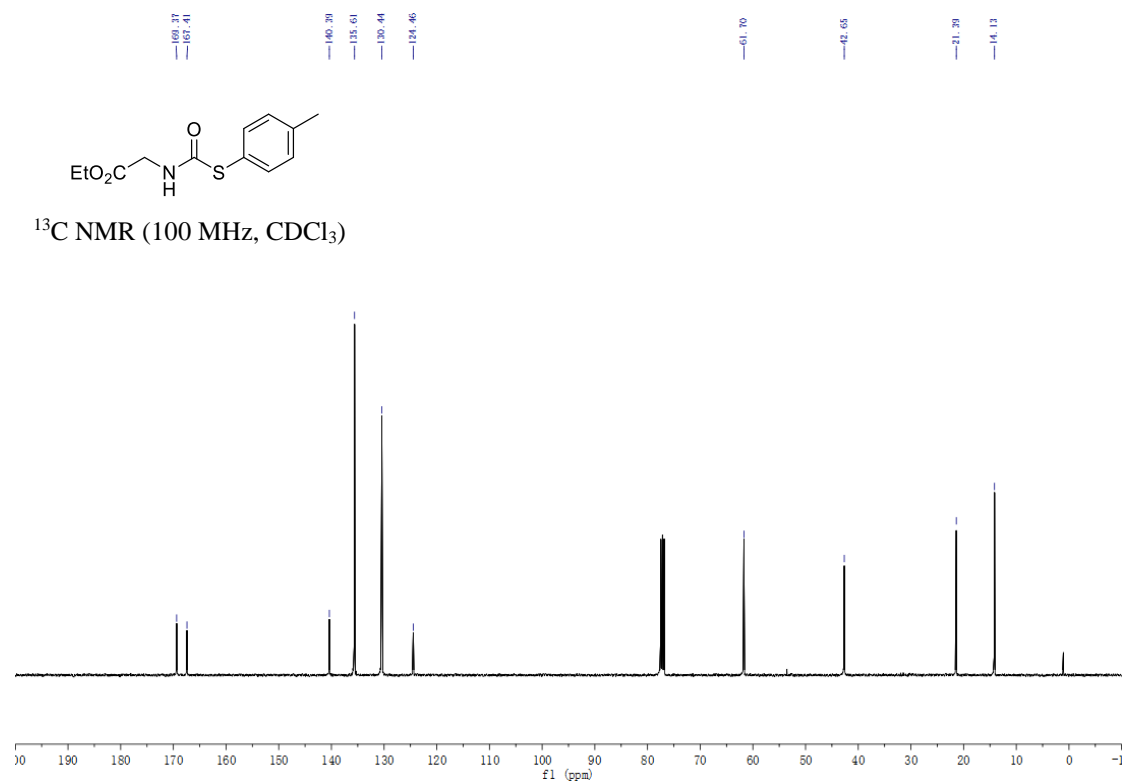

ethyl ((*m*-tolylthio)carbonyl)glycinate (3c)

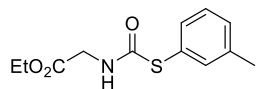

<sup>1</sup>H NMR (400 MHz, CDCl<sub>3</sub>)

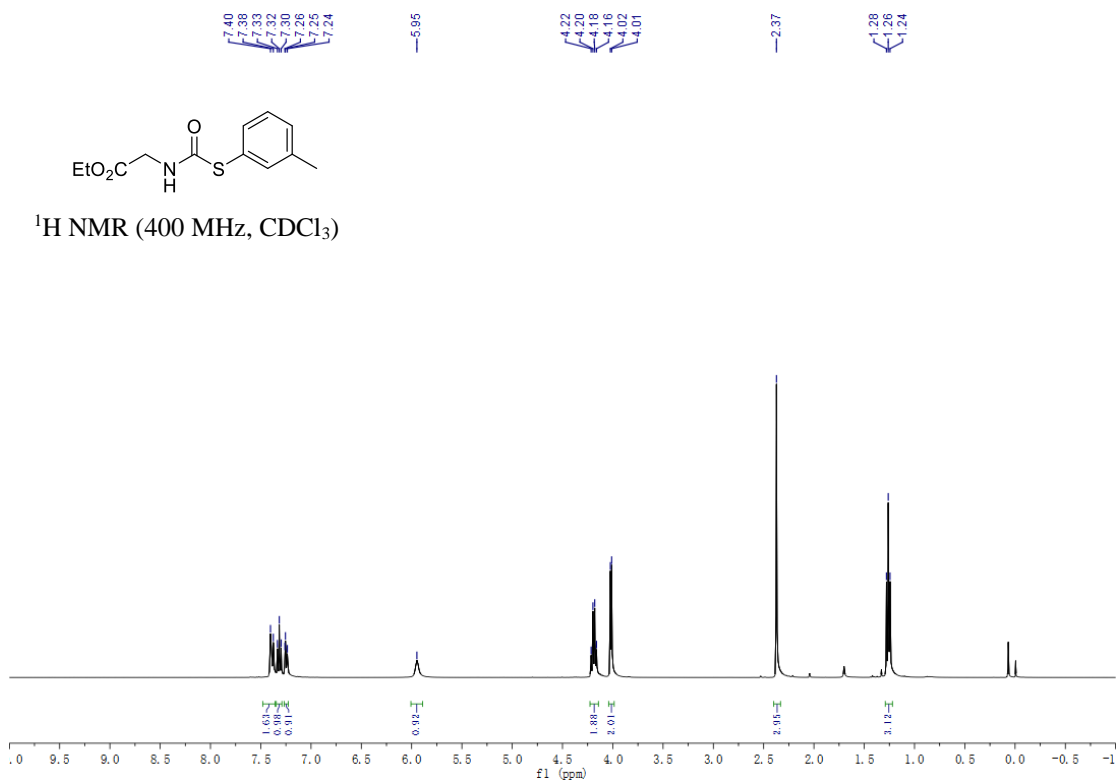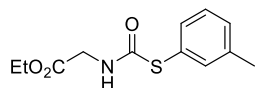

<sup>13</sup>C NMR (100 MHz, CDCl<sub>3</sub>)

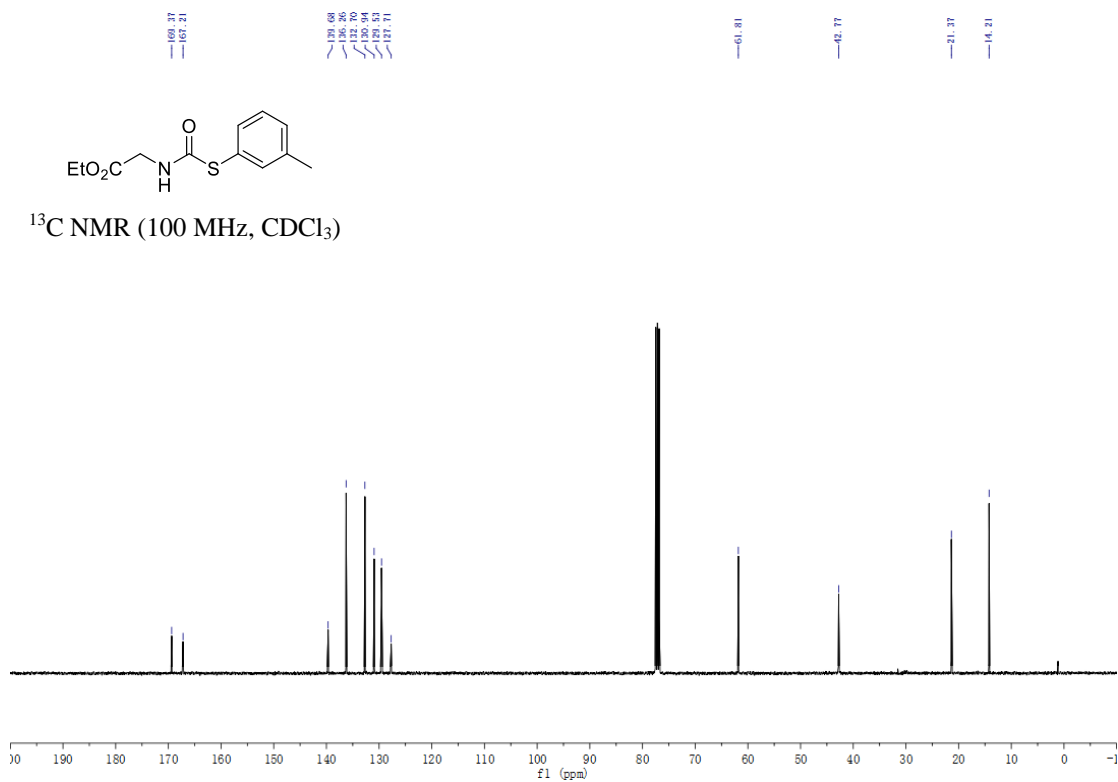

ethyl ((*o*-tolylthio)carbonyl)glycinate (3d)

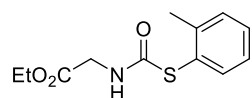

<sup>1</sup>H NMR (400 MHz, CDCl<sub>3</sub>)

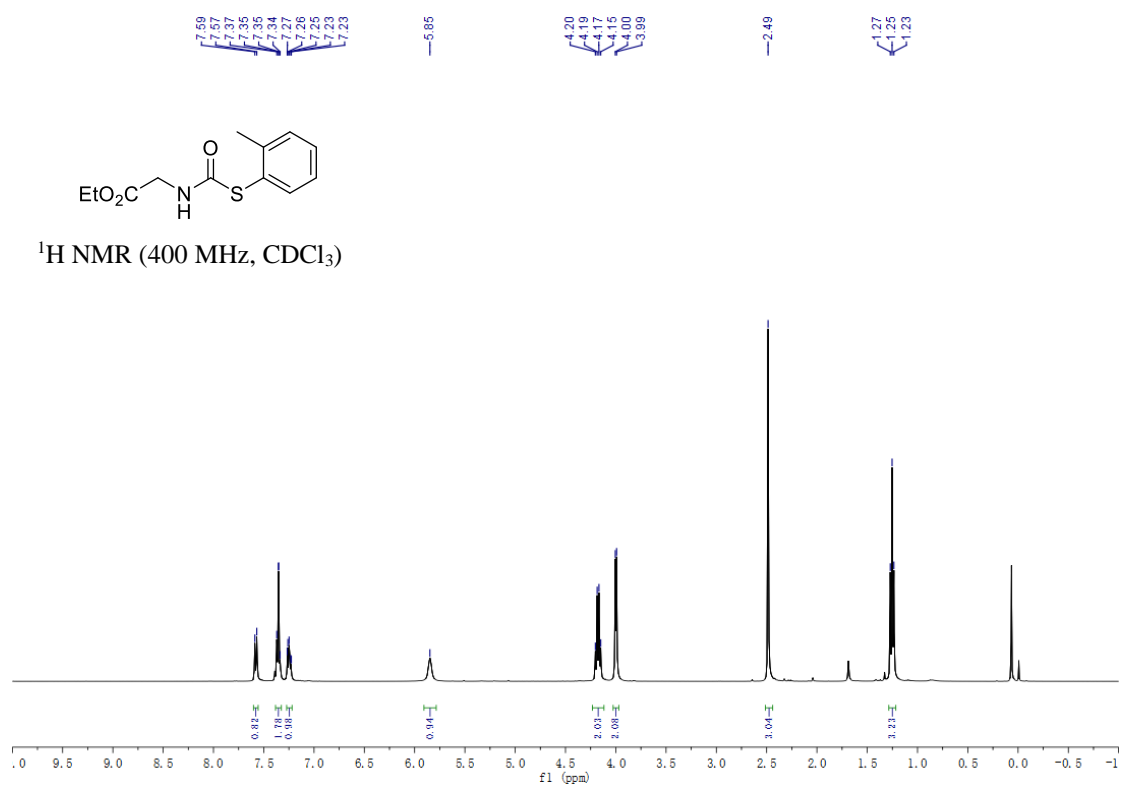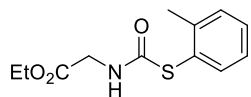

<sup>13</sup>C NMR (100 MHz, CDCl<sub>3</sub>)

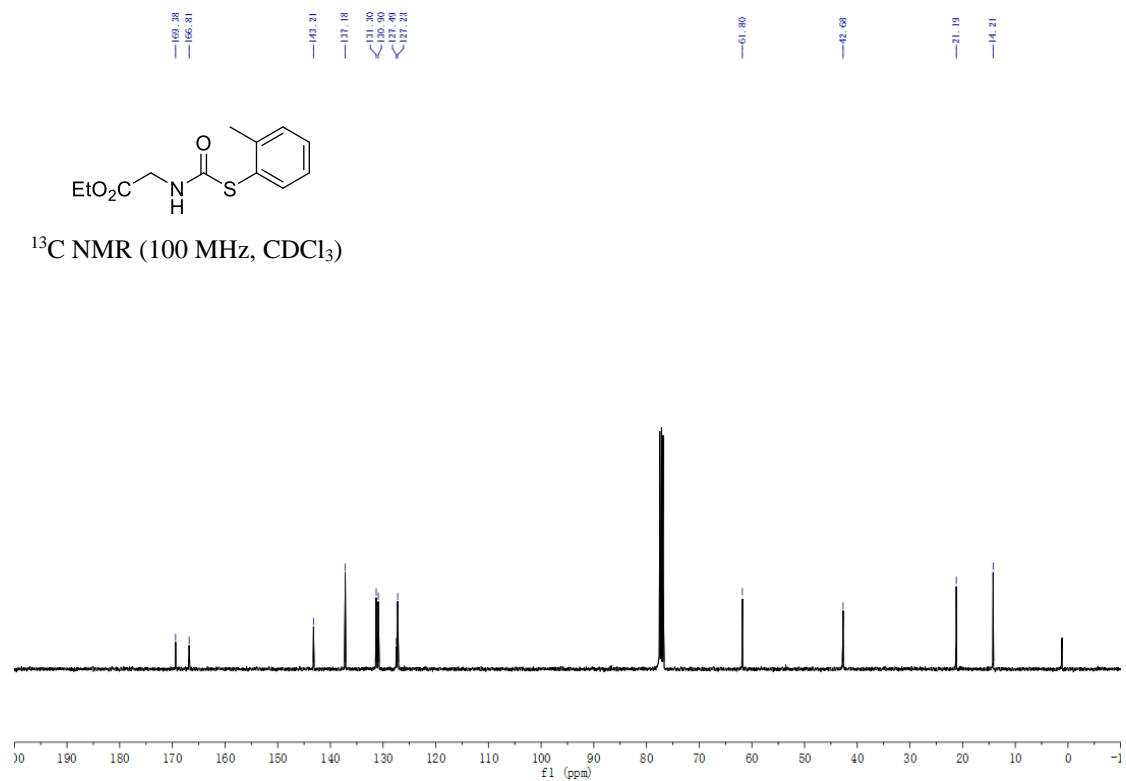



ethyl ((phenylthio)carbonyl)glycinate (3e)

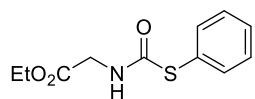

$^1\text{H}$  NMR (400 MHz,  $\text{CDCl}_3$ )

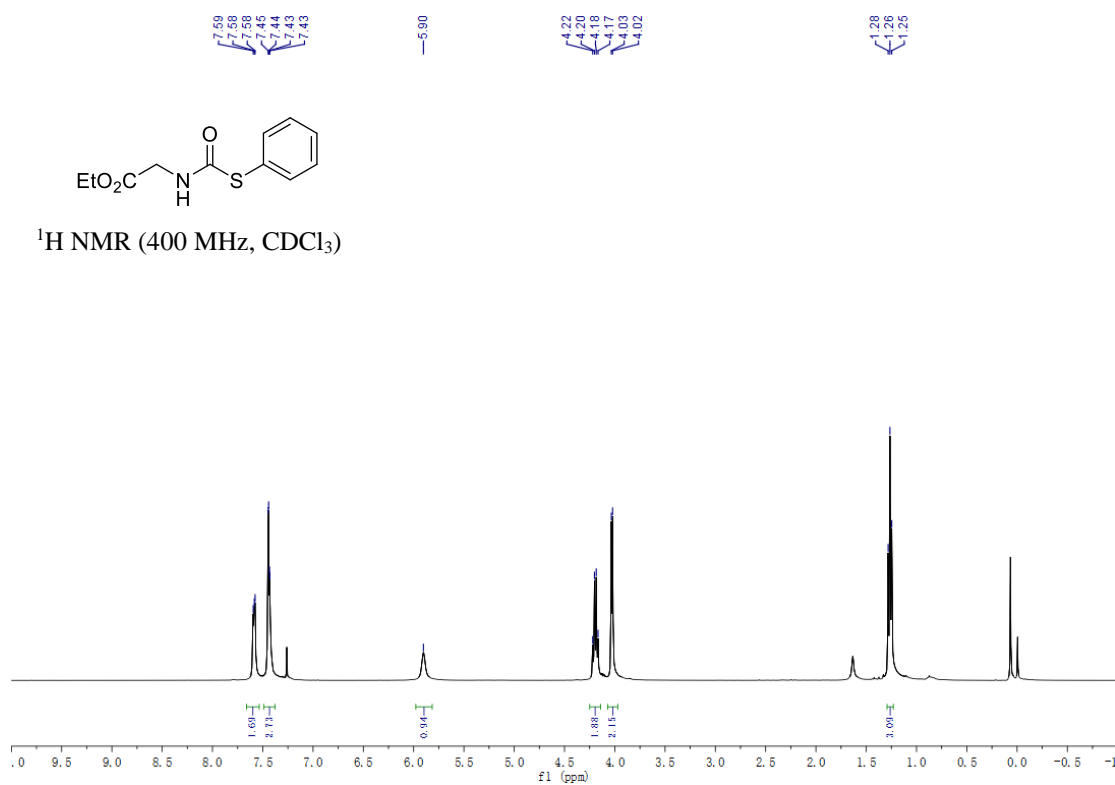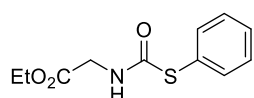

$^{13}\text{C}$  NMR (100 MHz,  $\text{CDCl}_3$ )

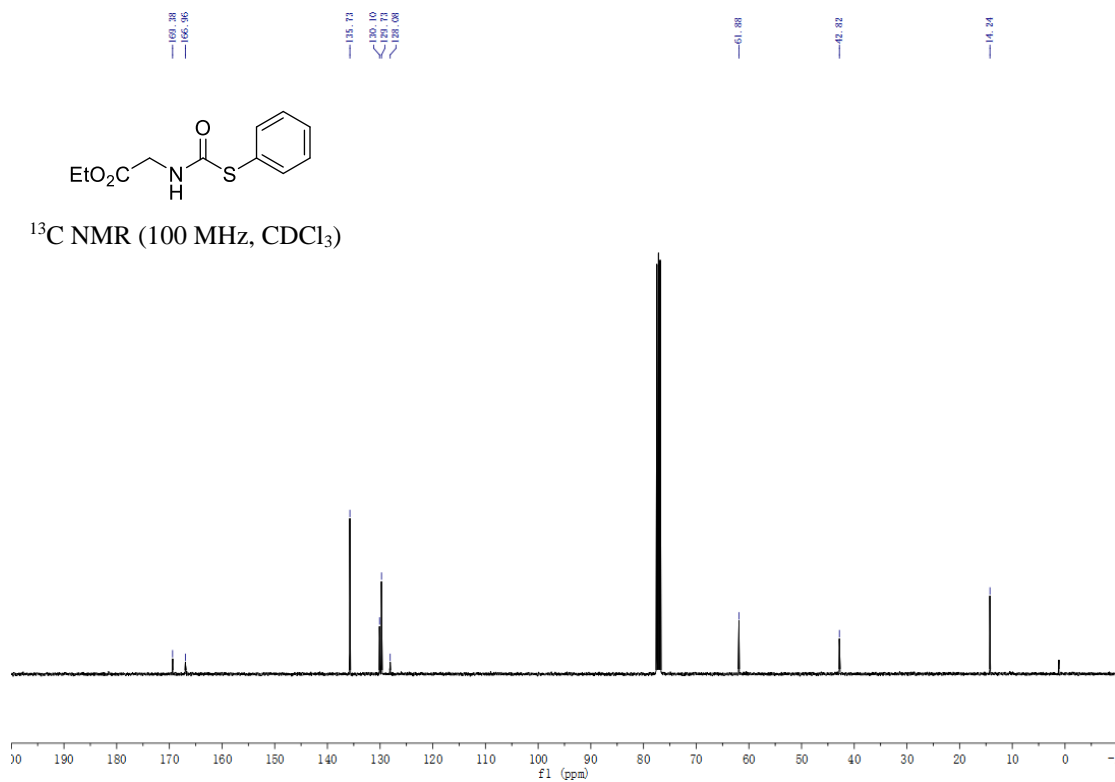

ethyl ((4-fluorophenyl)thio)carbonyl)glycinate (3f)

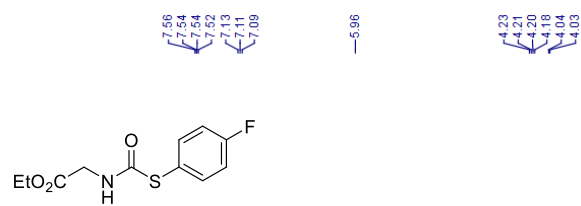

$^1\text{H}$  NMR (400 MHz,  $\text{CDCl}_3$ )

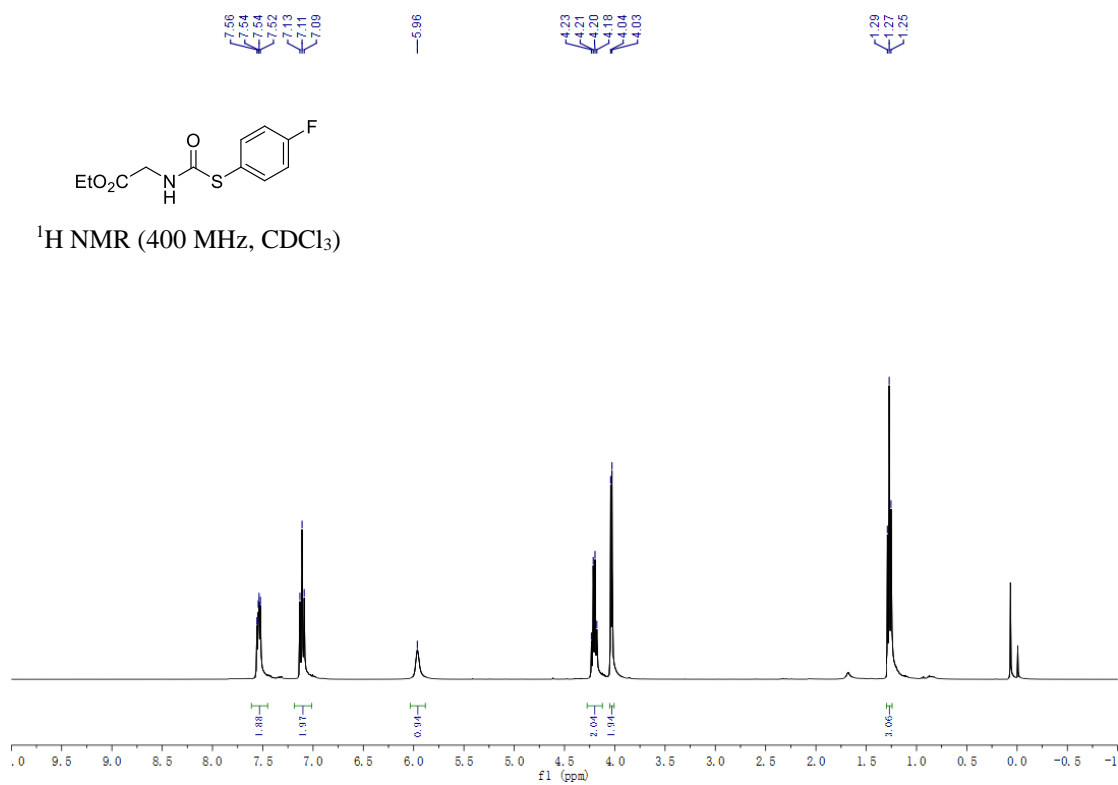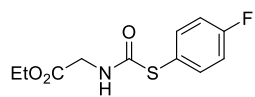

$^{13}\text{C}$  NMR (100 MHz,  $\text{CDCl}_3$ )

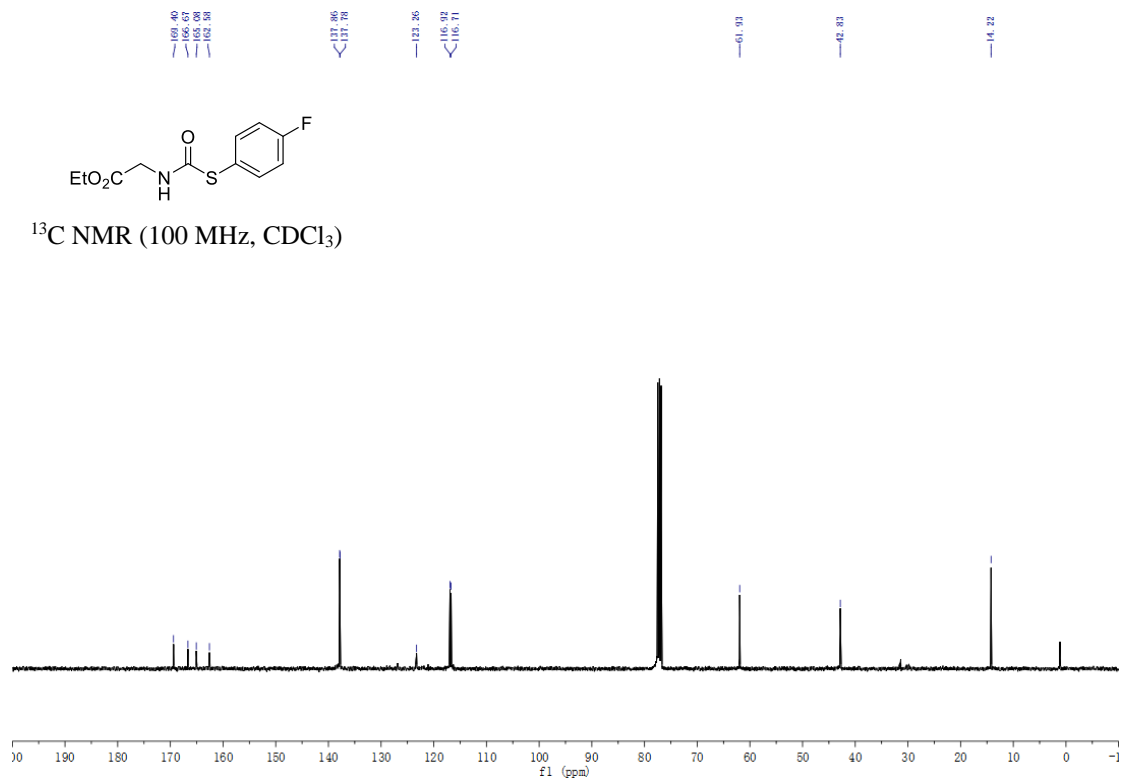

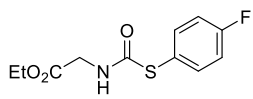

$^{19}\text{F}$  NMR (376 MHz,  $\text{CDCl}_3$ )

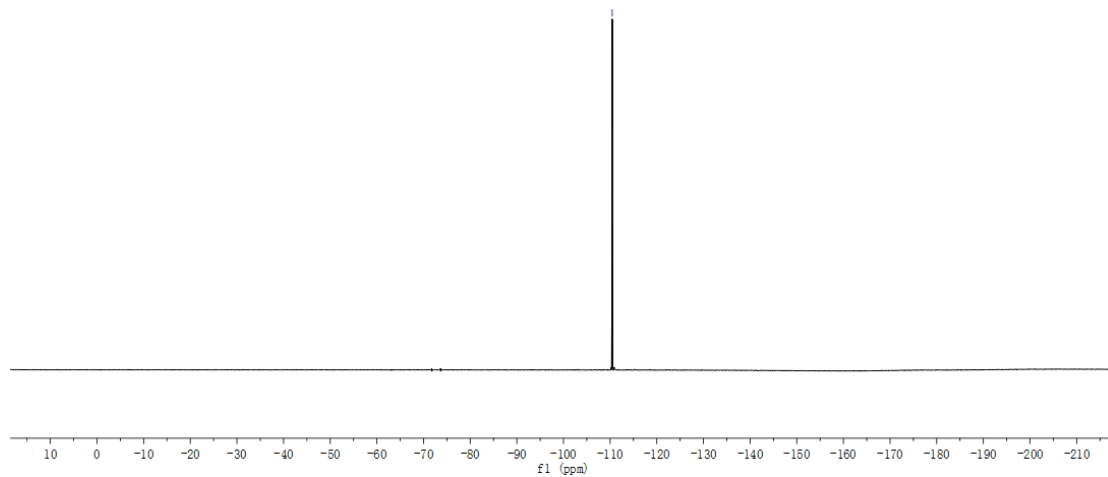

ethyl ((2-fluorophenyl)thio)carbonylglycinate (3g)

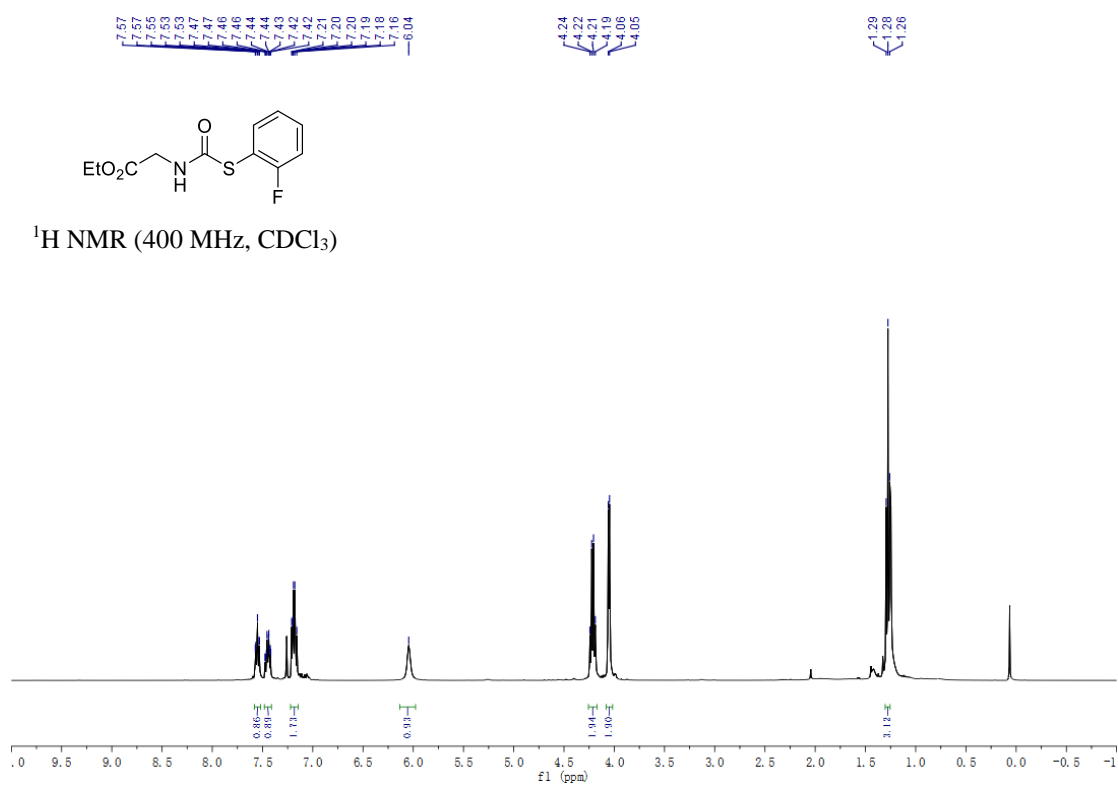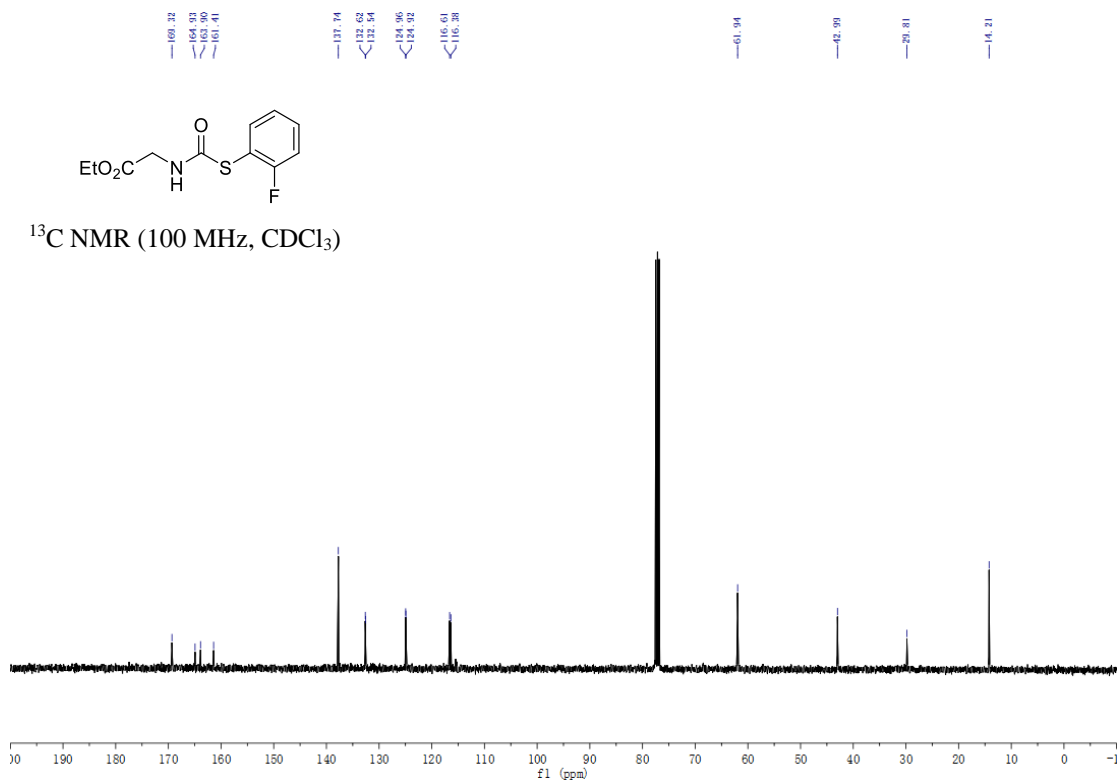

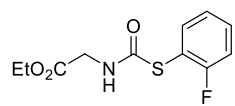

$^{19}\text{F}$  NMR (376 MHz,  $\text{CDCl}_3$ )

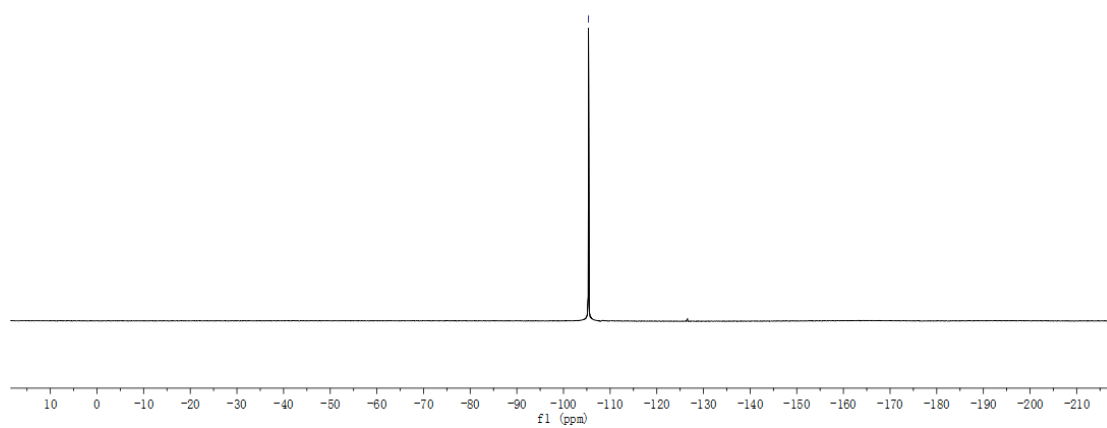

ethyl (((4-chlorophenyl)thio)carbonyl)glycinate (3h)

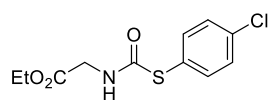

$^1\text{H}$  NMR (400 MHz,  $\text{CDCl}_3$ )

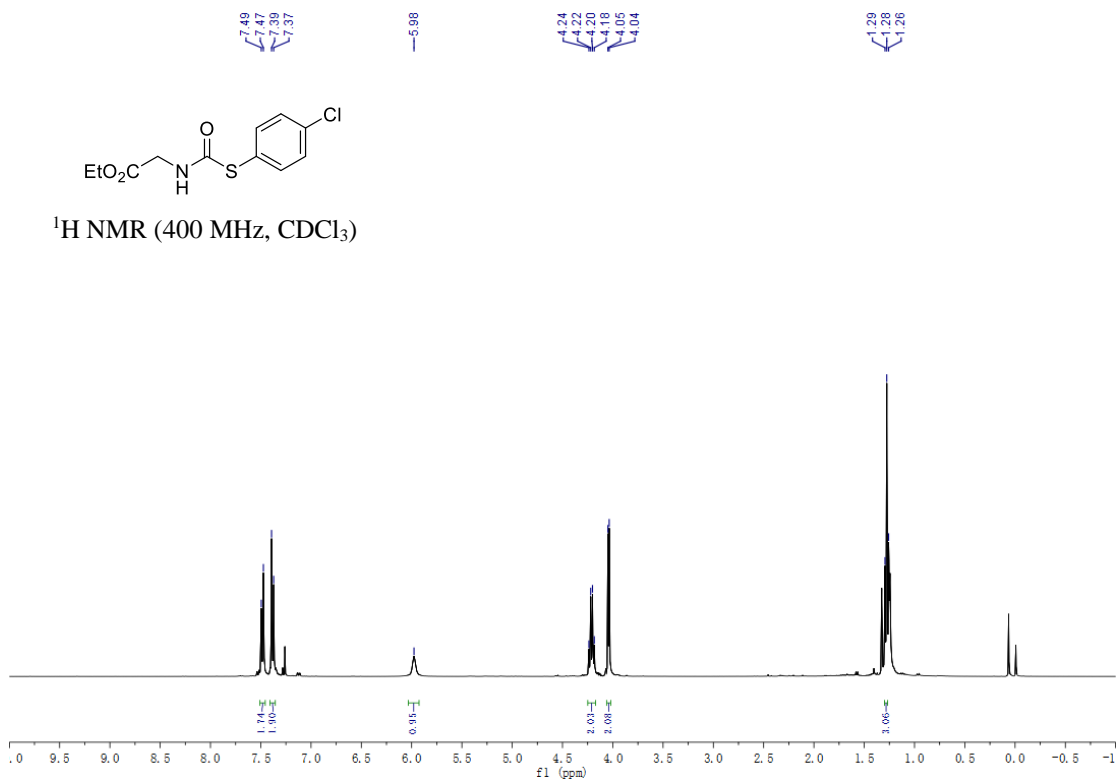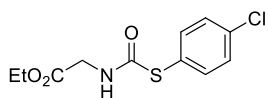

$^{13}\text{C}$  NMR (100 MHz,  $\text{CDCl}_3$ )

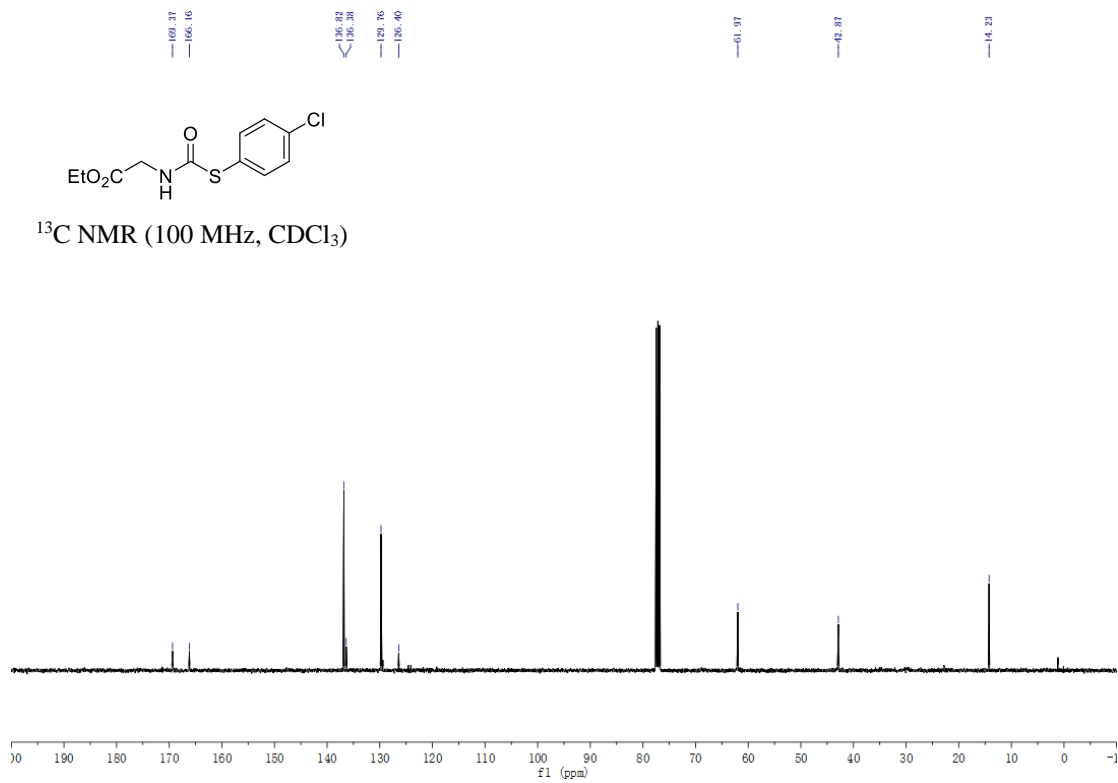

ethyl (((2-chlorophenyl)thio)carbonyl)glycinate (3i)

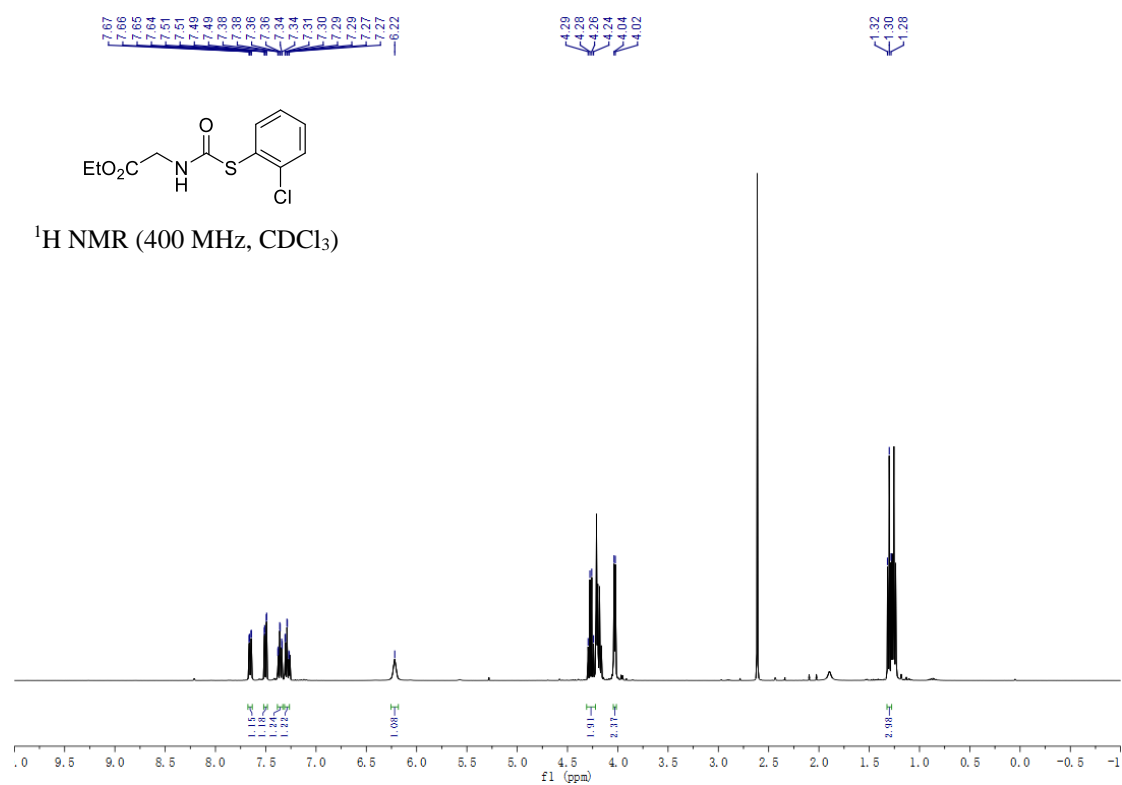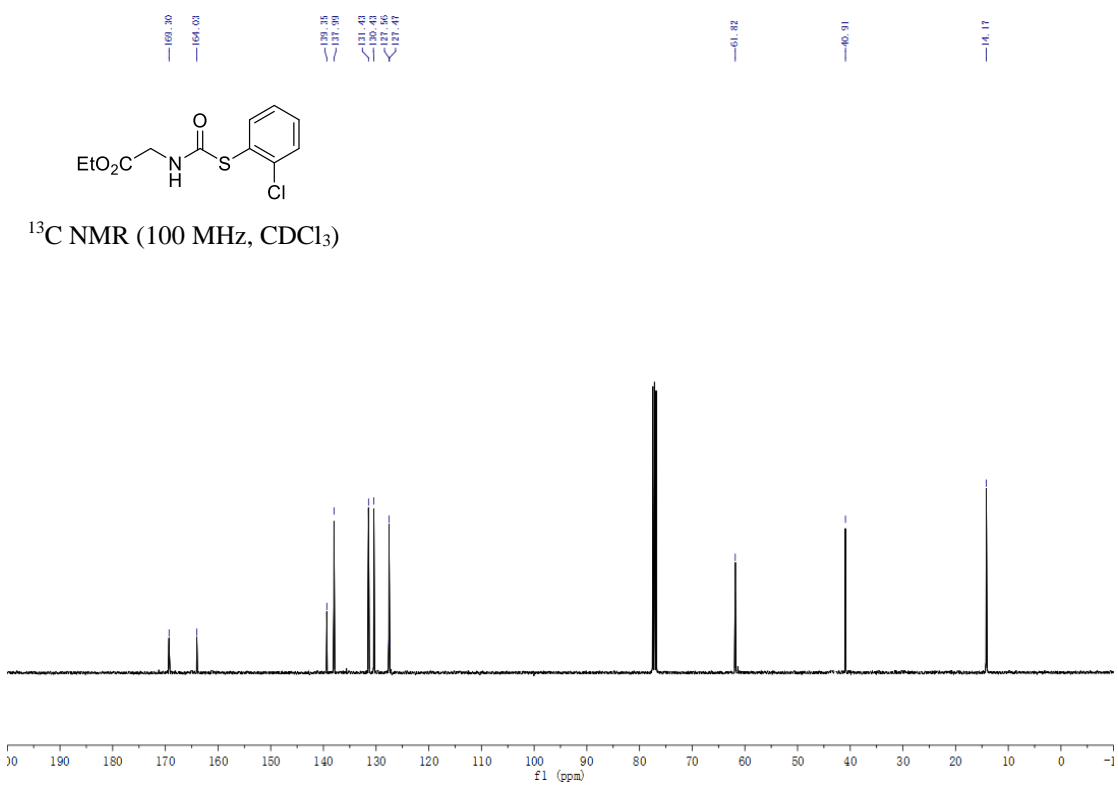

ethyl ((4-bromophenyl)thio)carbonylglycinate (3j)

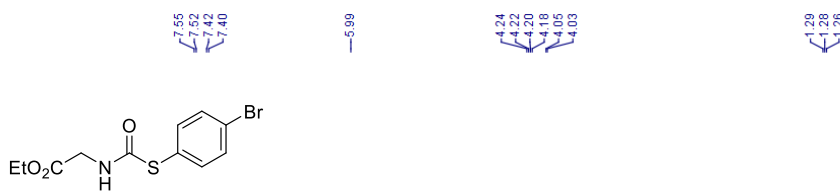

<sup>1</sup>H NMR (400 MHz, CDCl<sub>3</sub>)

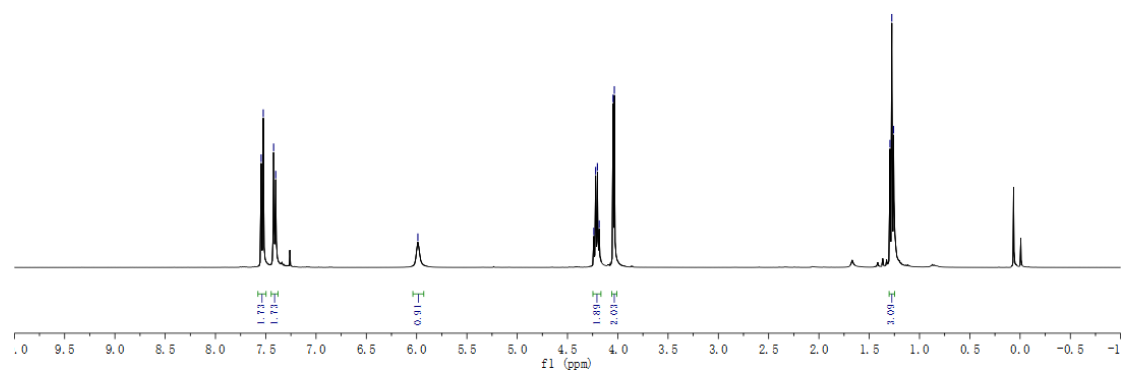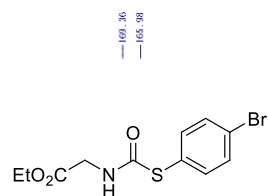

<sup>13</sup>C NMR (100 MHz, CDCl<sub>3</sub>)

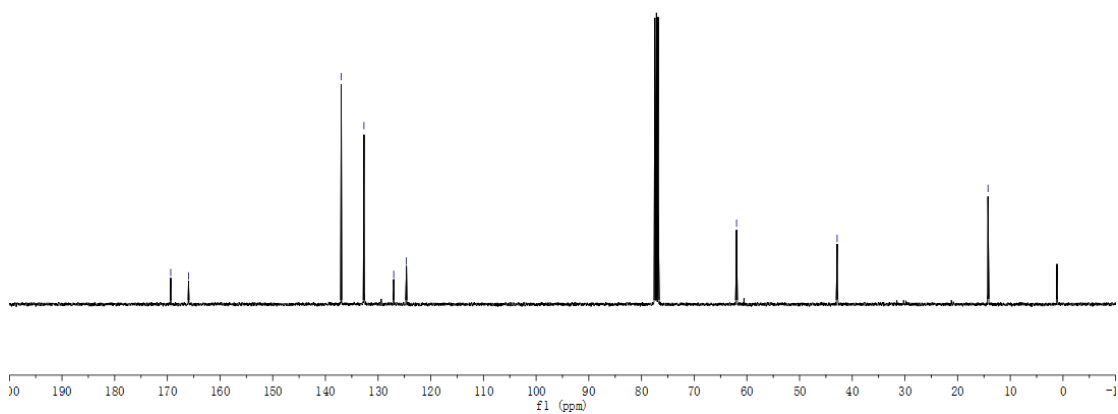



ethyl ((3-bromophenyl)thio)carbonylglycinate (3k)

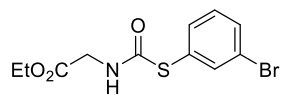

$^1\text{H}$  NMR (400 MHz,  $\text{CDCl}_3$ )

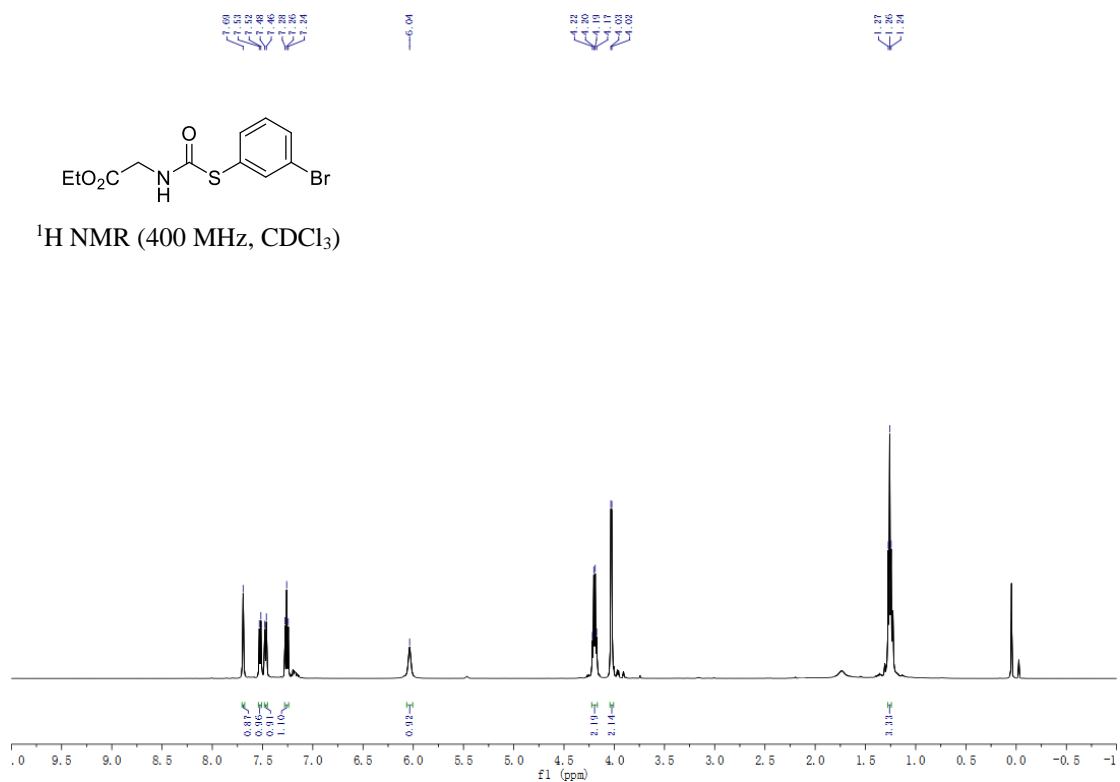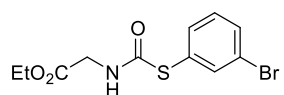

$^{13}\text{C}$  NMR (100 MHz,  $\text{CDCl}_3$ )

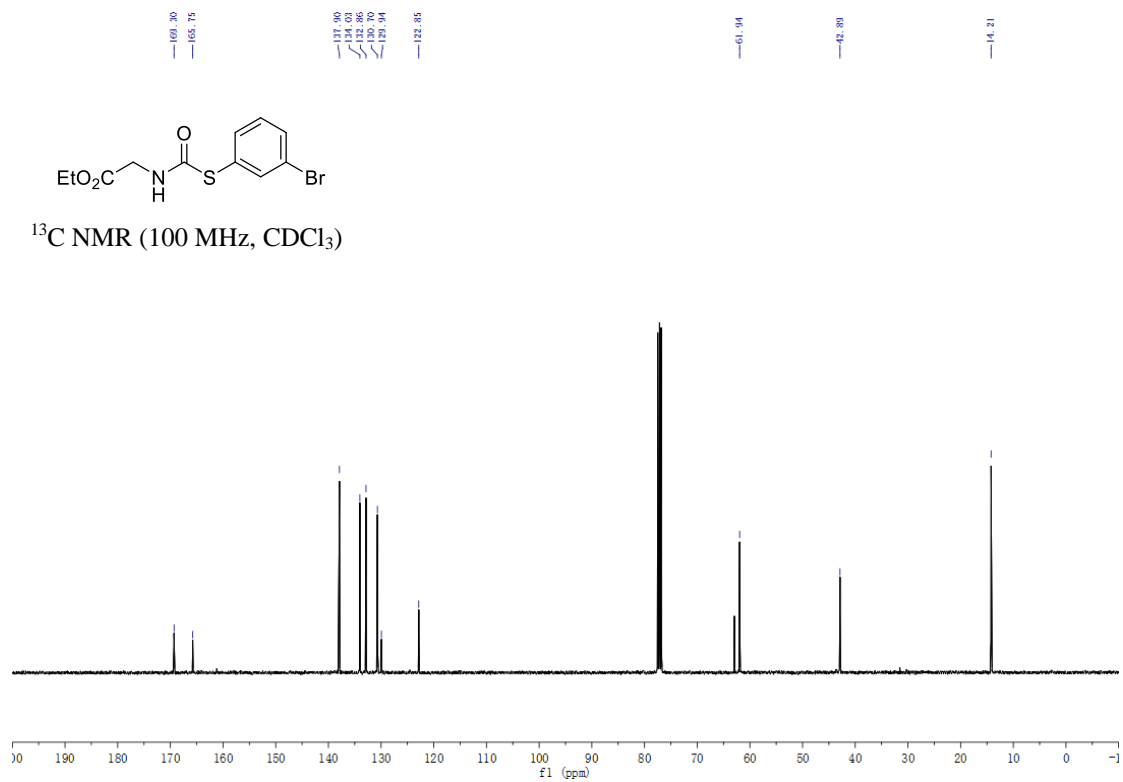

ethyl (((2-bromophenyl)thio)carbonyl)glycinate (31)

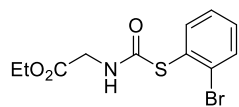

$^1\text{H}$  NMR (400 MHz,  $\text{CDCl}_3$ )

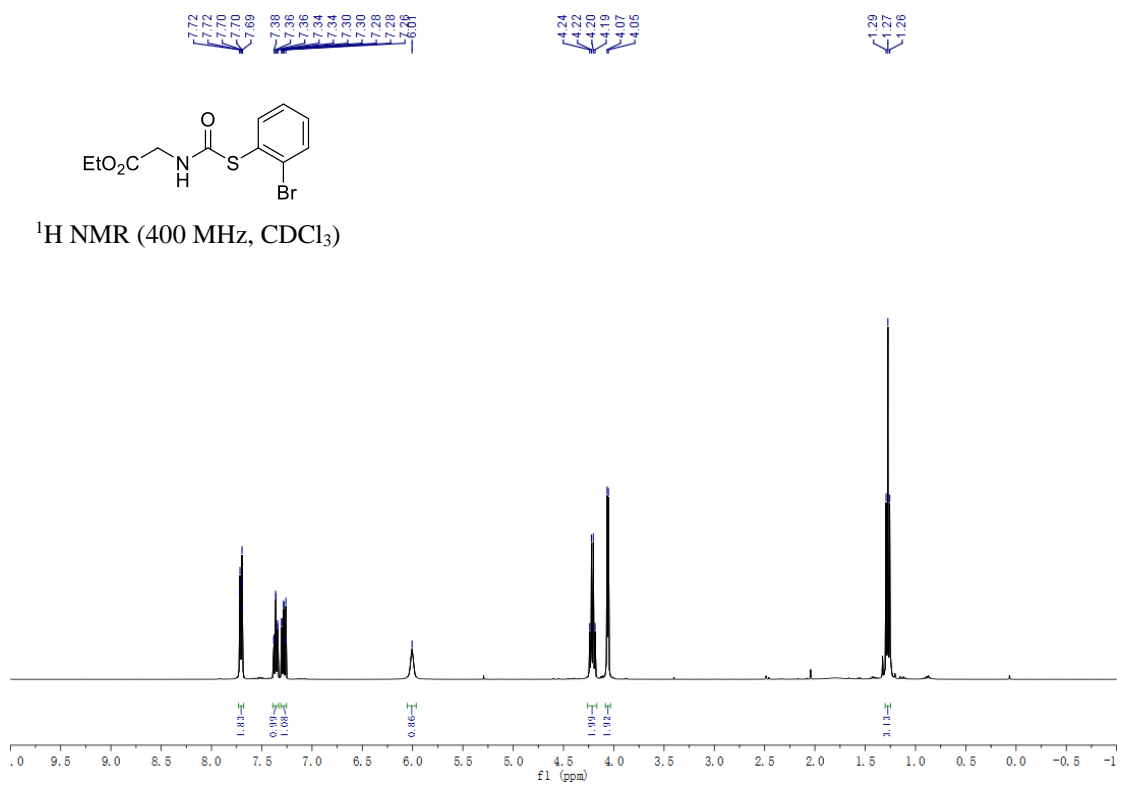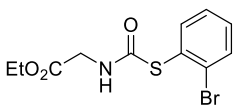

$^{13}\text{C}$  NMR (100 MHz,  $\text{CDCl}_3$ )

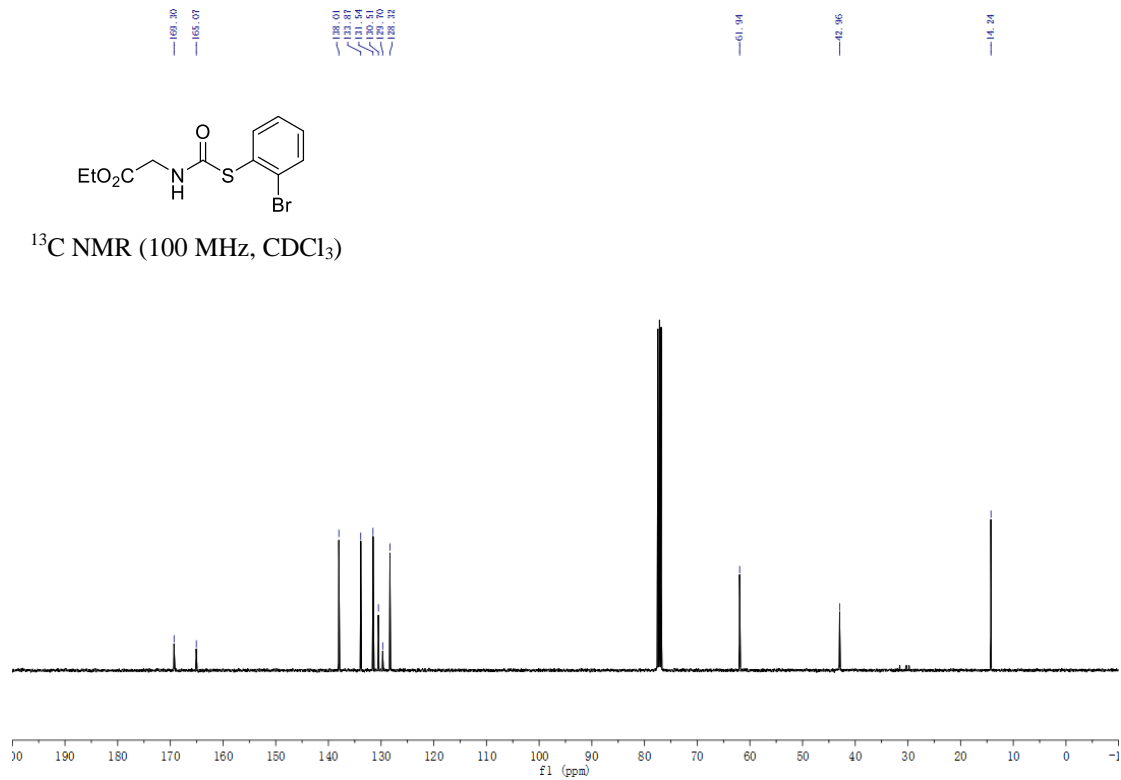

ethyl (((2,6-dimethylphenyl)thio)carbonyl)glycinate (3m)

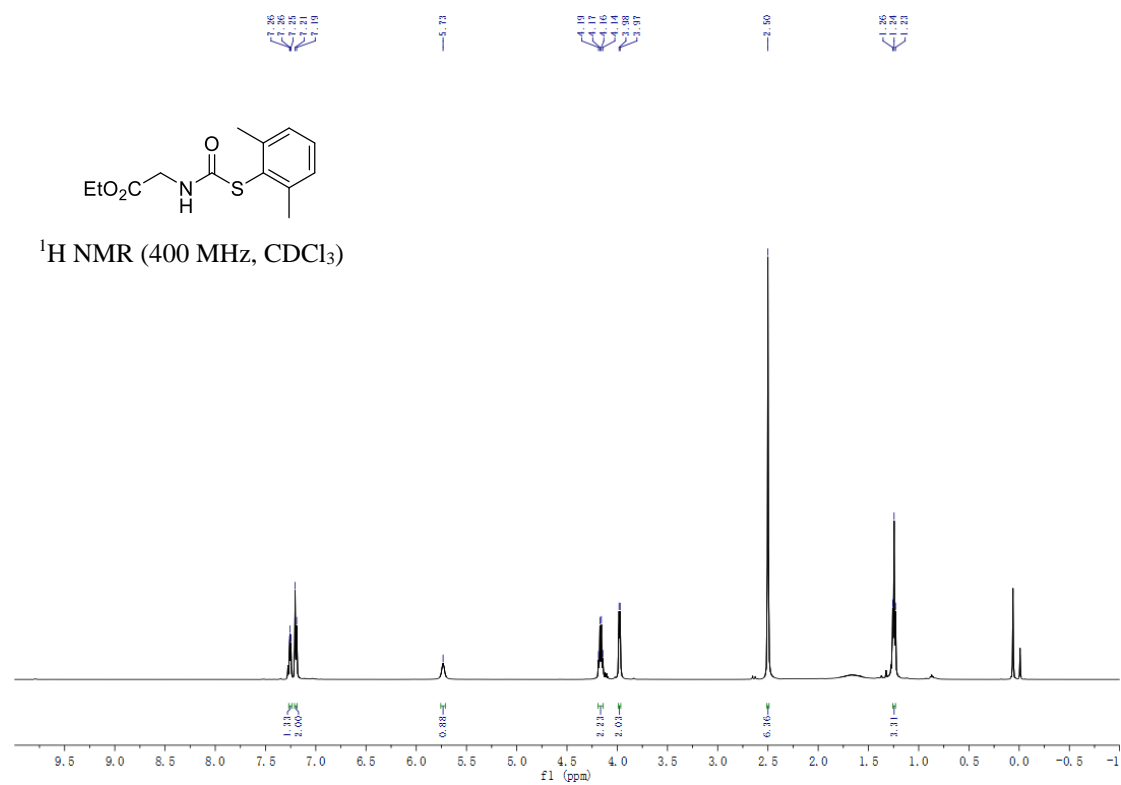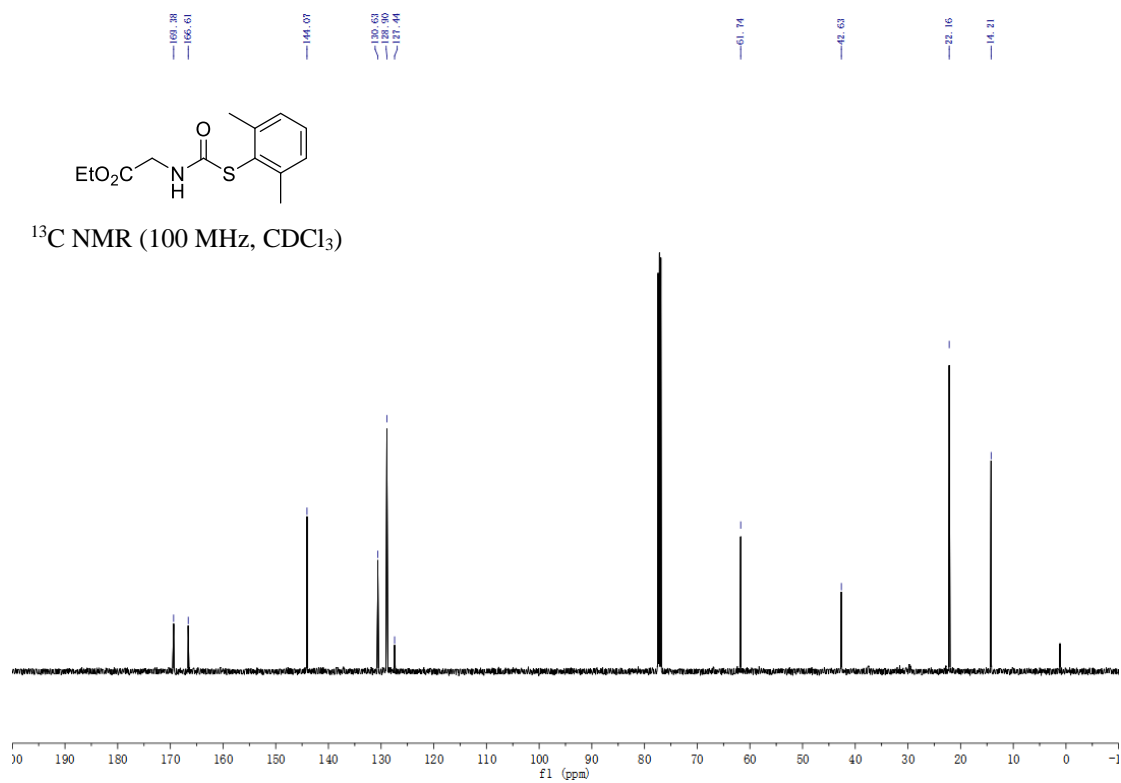

ethyl (((4-hydroxyphenyl)thio)carbonyl)glycinate (3n)

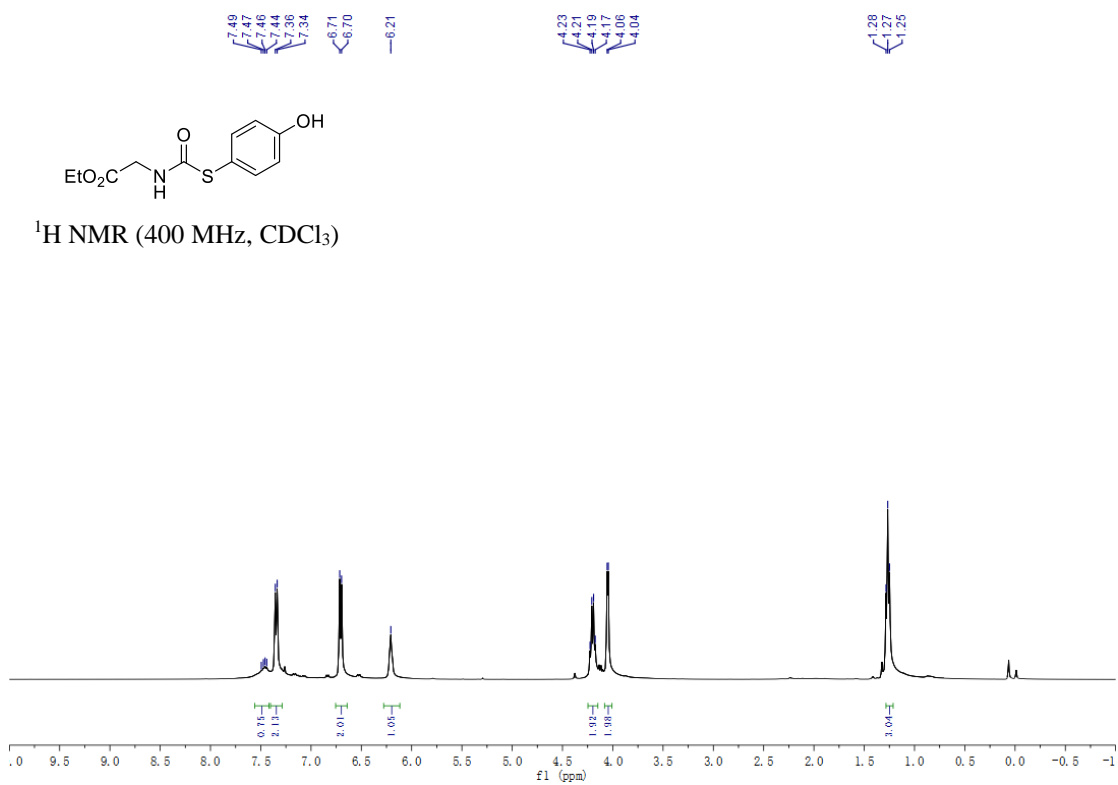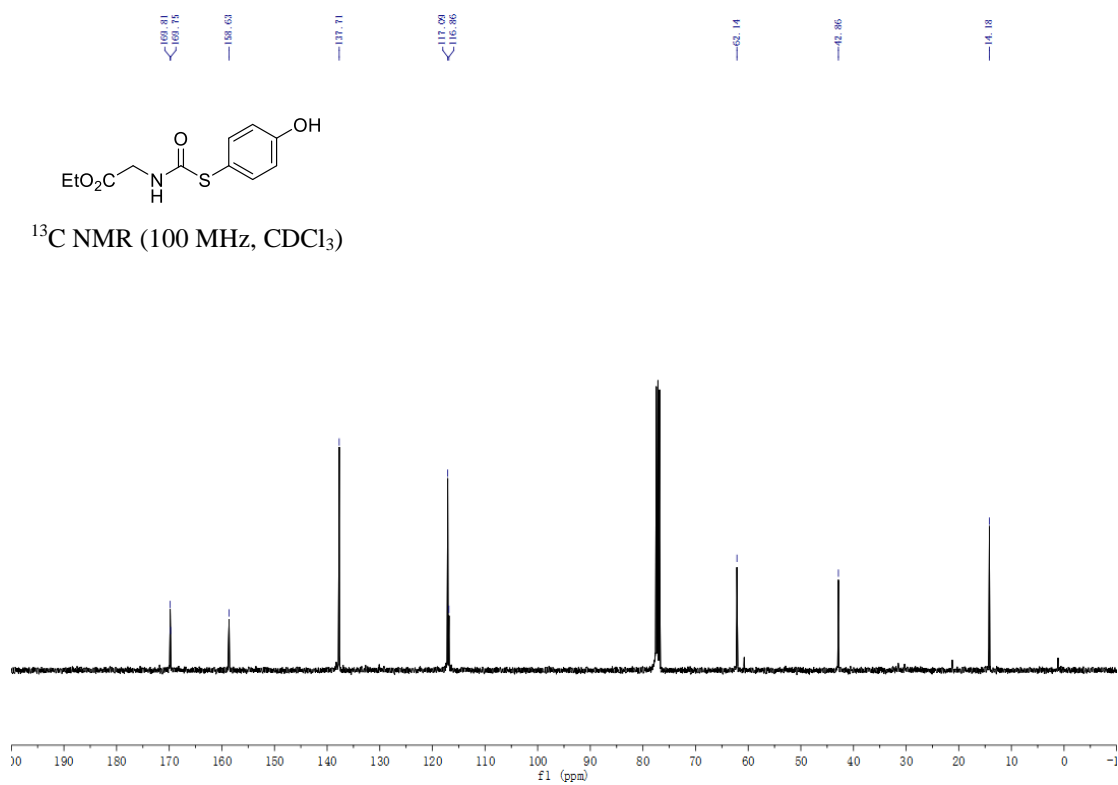

ethyl ((naphthalen-2-ylthio)carbonyl)glycinate (3o)

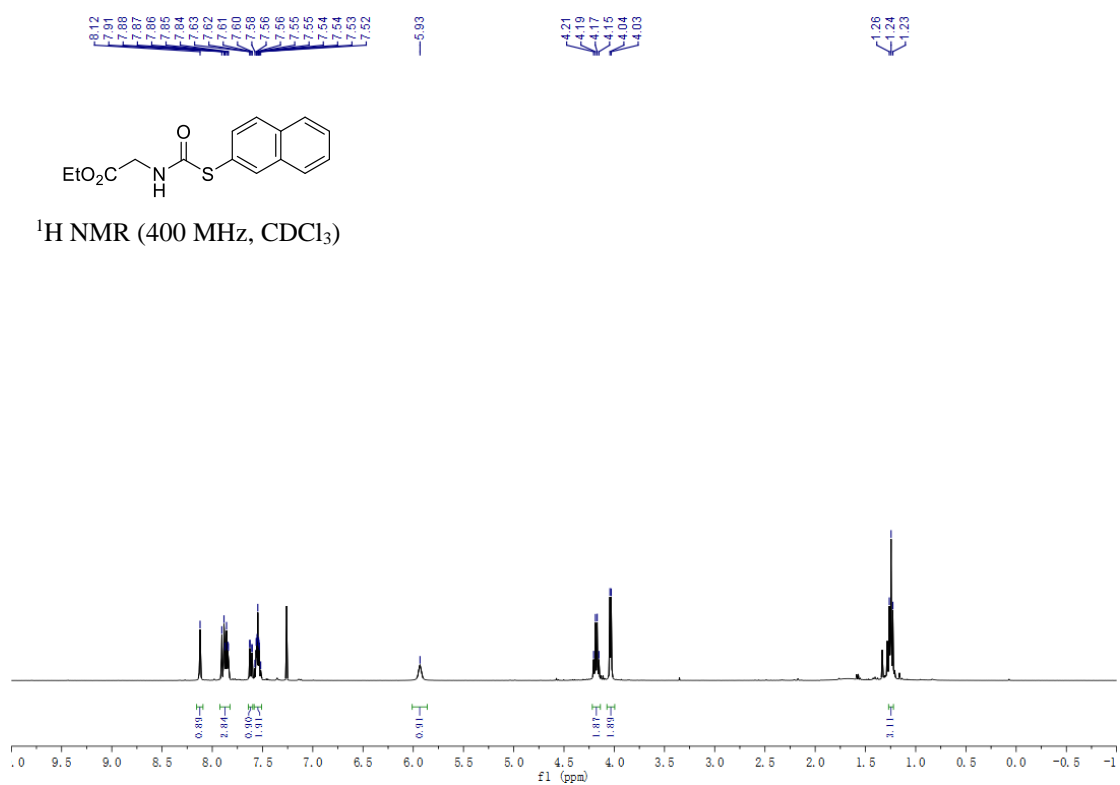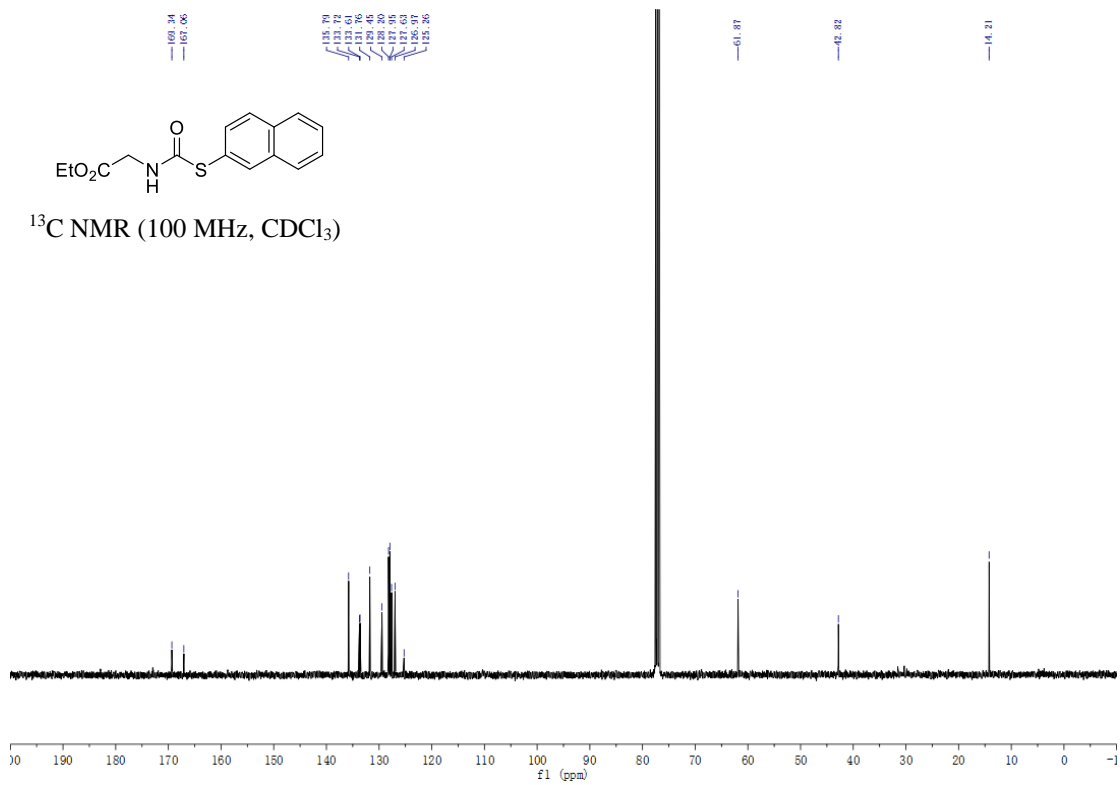

ethyl ((thiophen-2-ylthio)carbonyl)glycinate (3p)

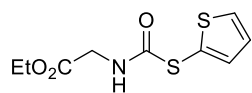

$^1\text{H}$  NMR (400 MHz,  $\text{CDCl}_3$ )

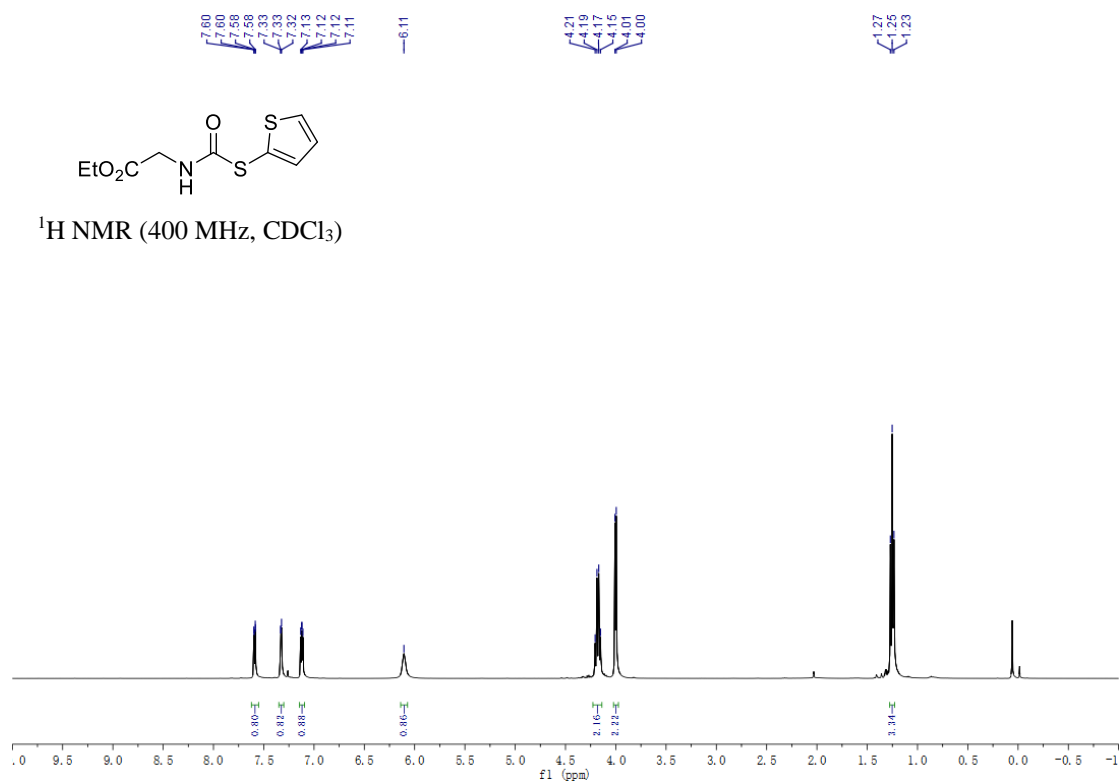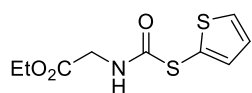

$^{13}\text{C}$  NMR (100 MHz,  $\text{CDCl}_3$ )

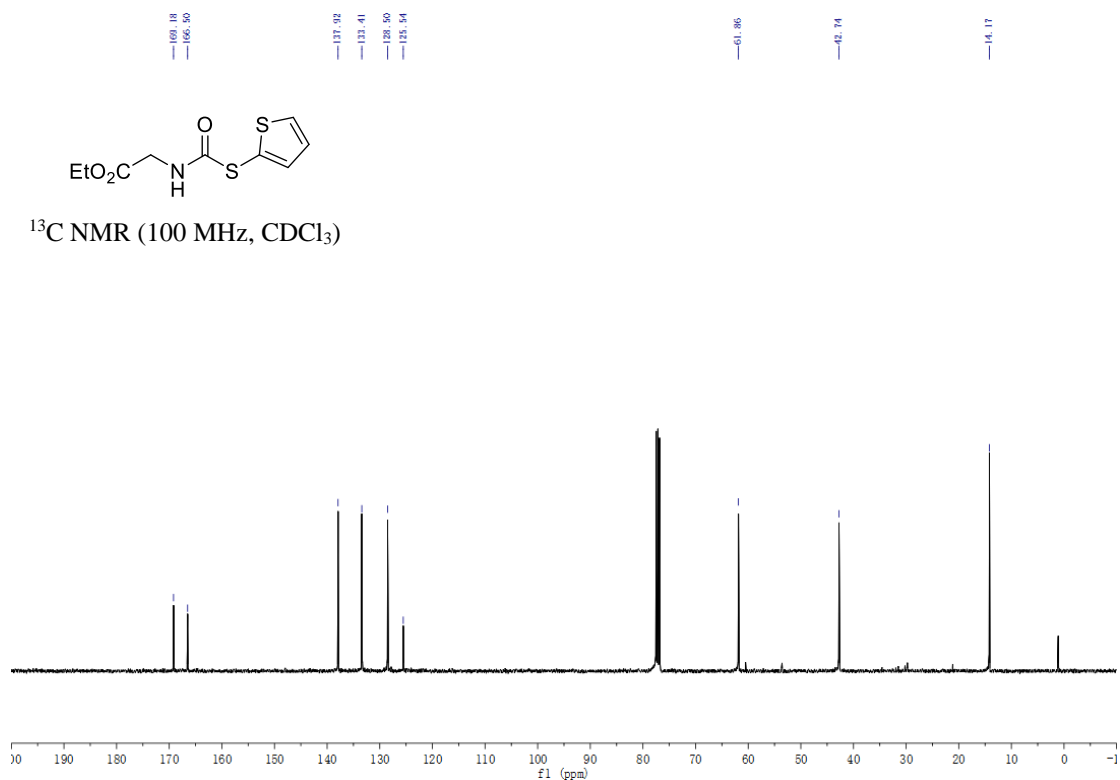

ethyl ((benzylthio)carbonyl)glycinate (3q)

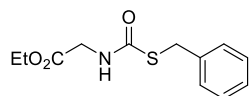

<sup>1</sup>H NMR (400 MHz, CDCl<sub>3</sub>)

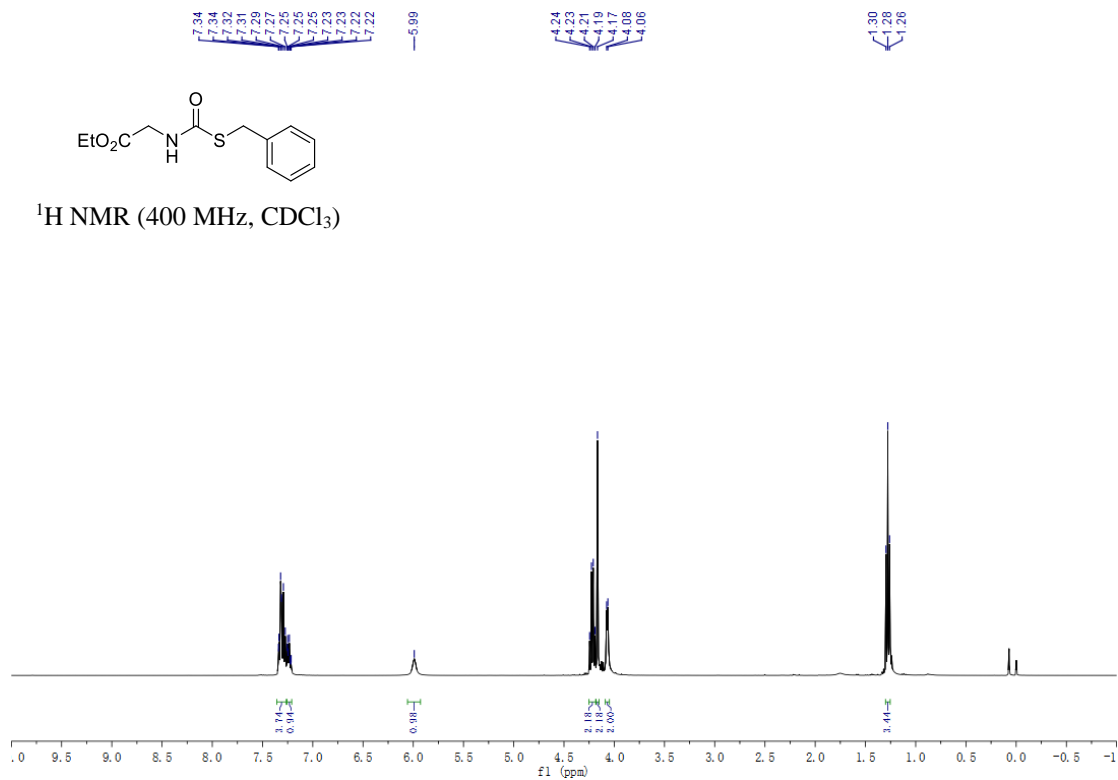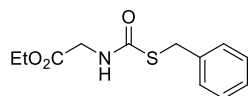

<sup>13</sup>C NMR (100 MHz, CDCl<sub>3</sub>)

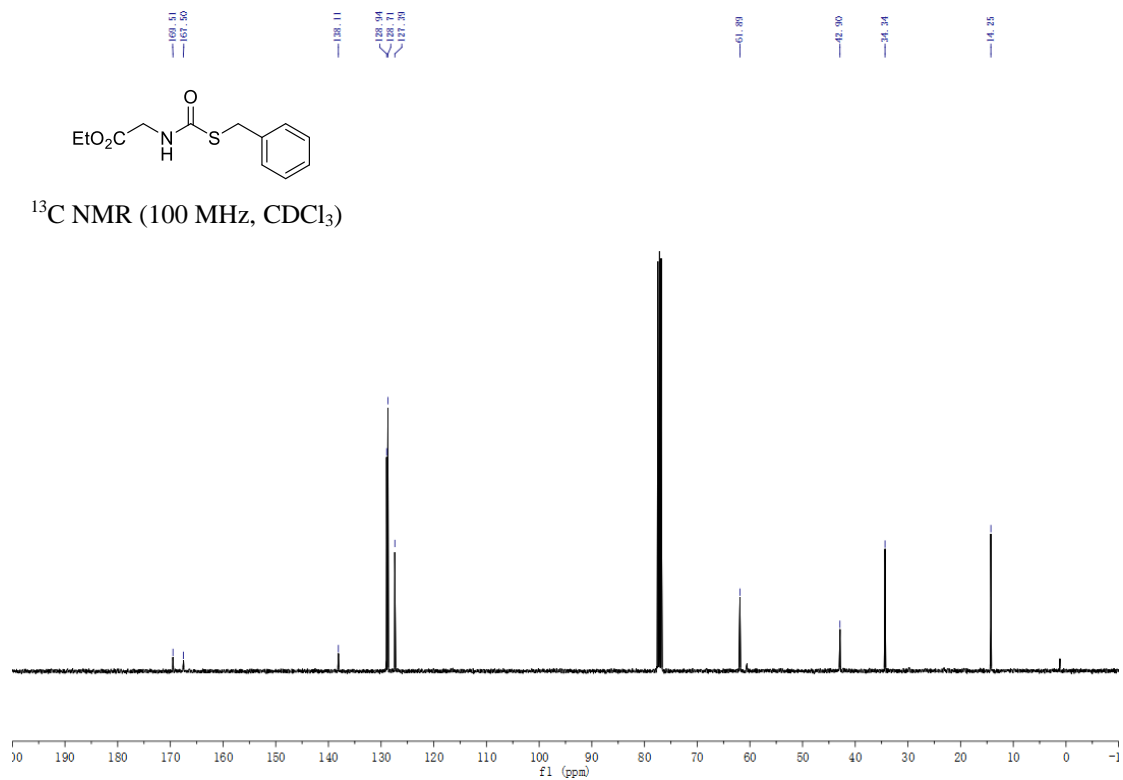

ethyl ((phenethylthio)carbonyl)glycinate (3r)

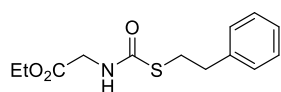

<sup>1</sup>H NMR (400 MHz, CDCl<sub>3</sub>)

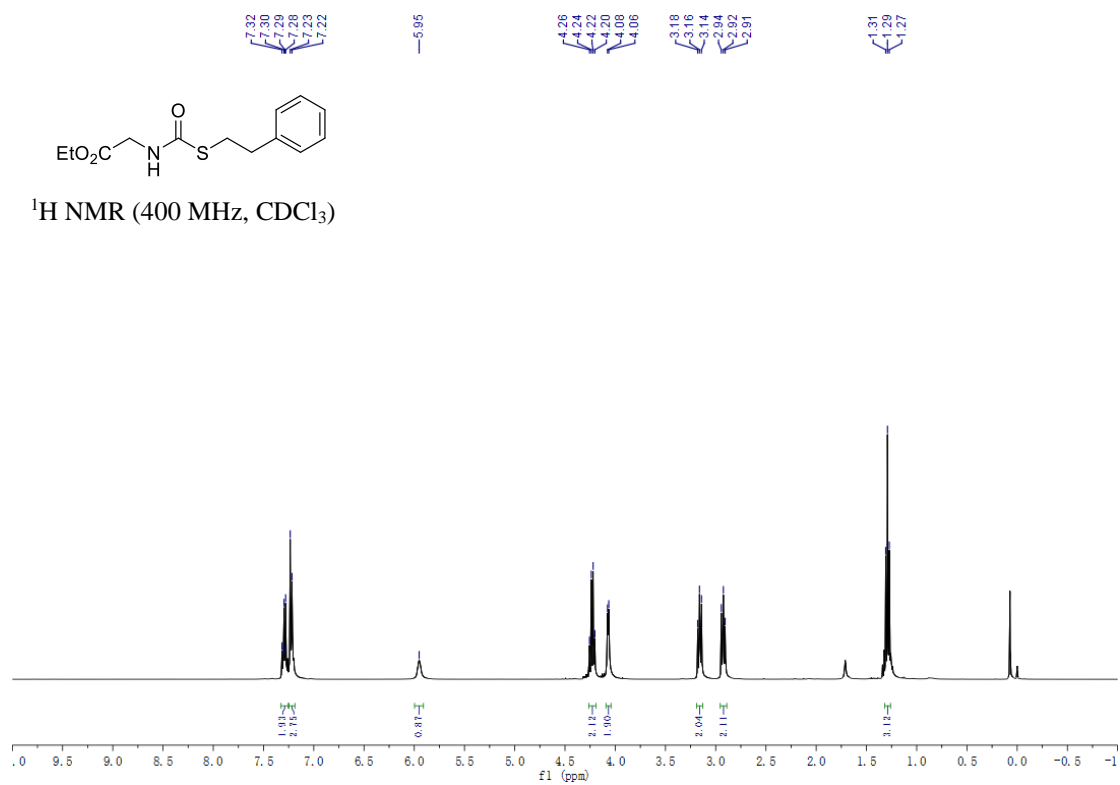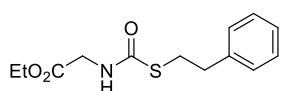

<sup>13</sup>C NMR (100 MHz, CDCl<sub>3</sub>)

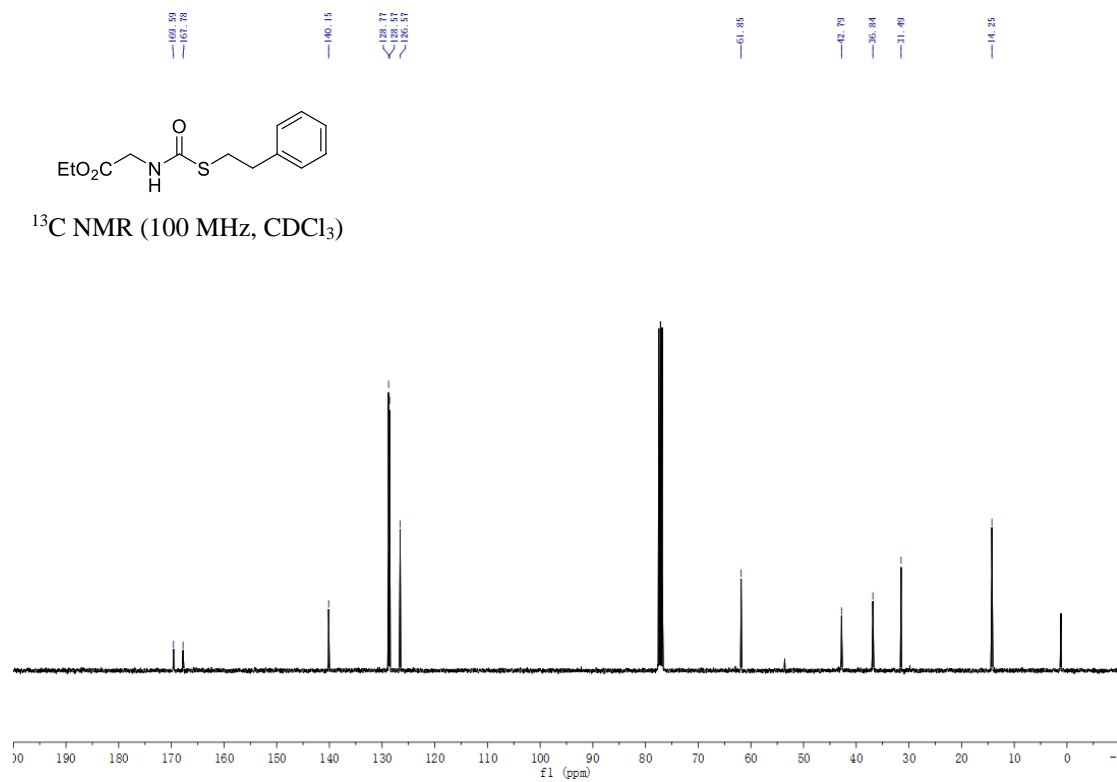



ethyl ((propylthio)carbonyl)glycinate (3s)

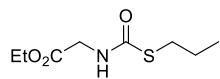

<sup>1</sup>H NMR (400 MHz, CDCl<sub>3</sub>)

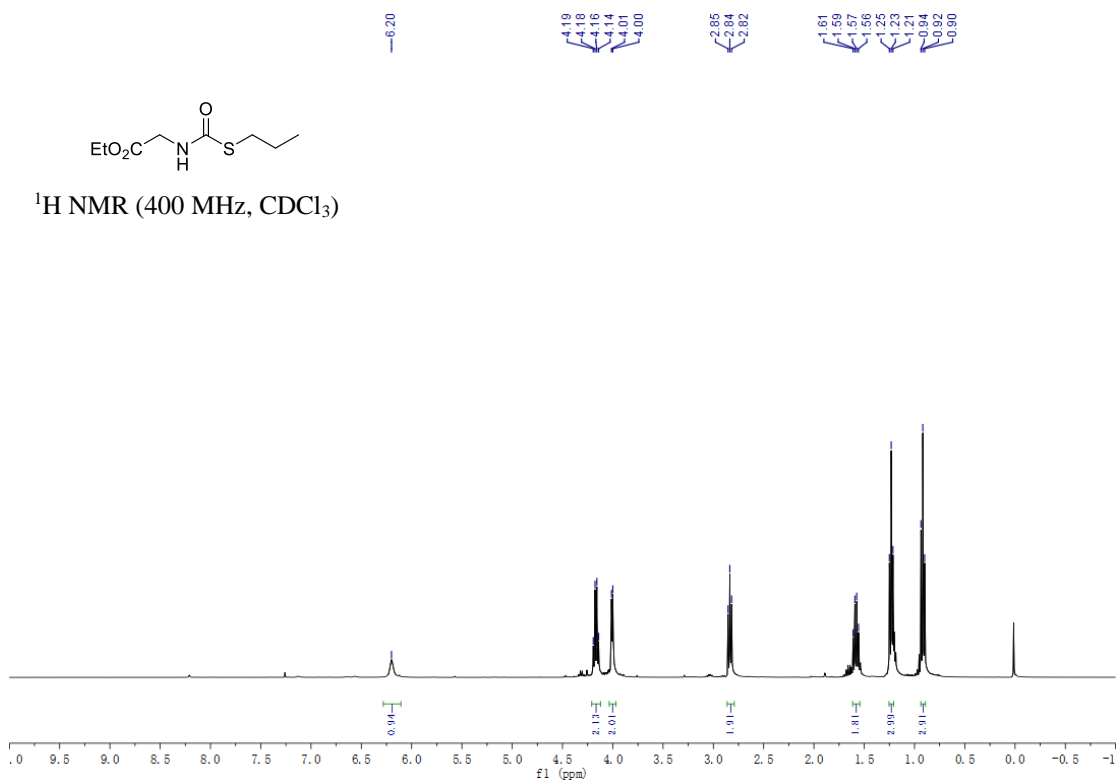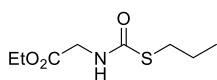

<sup>13</sup>C NMR (100 MHz, CDCl<sub>3</sub>)

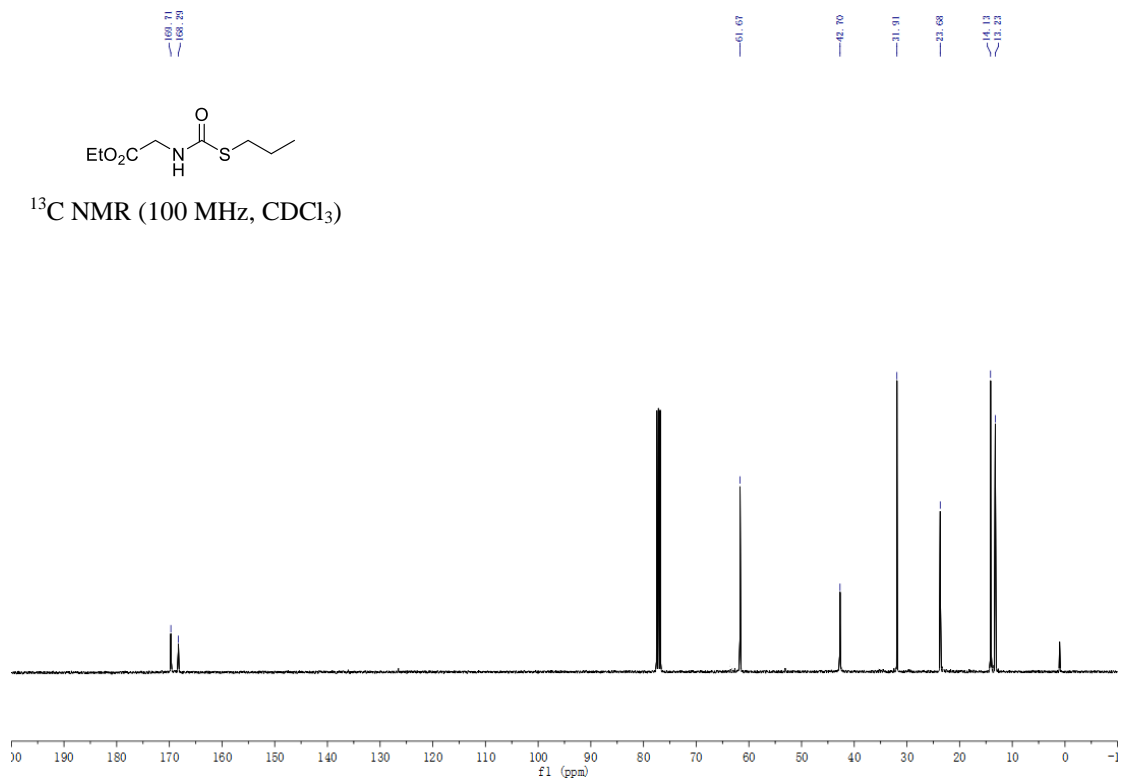

*methyl ((4-(tert-butyl)phenyl)thio)carbonyl)glycinate (3t)*

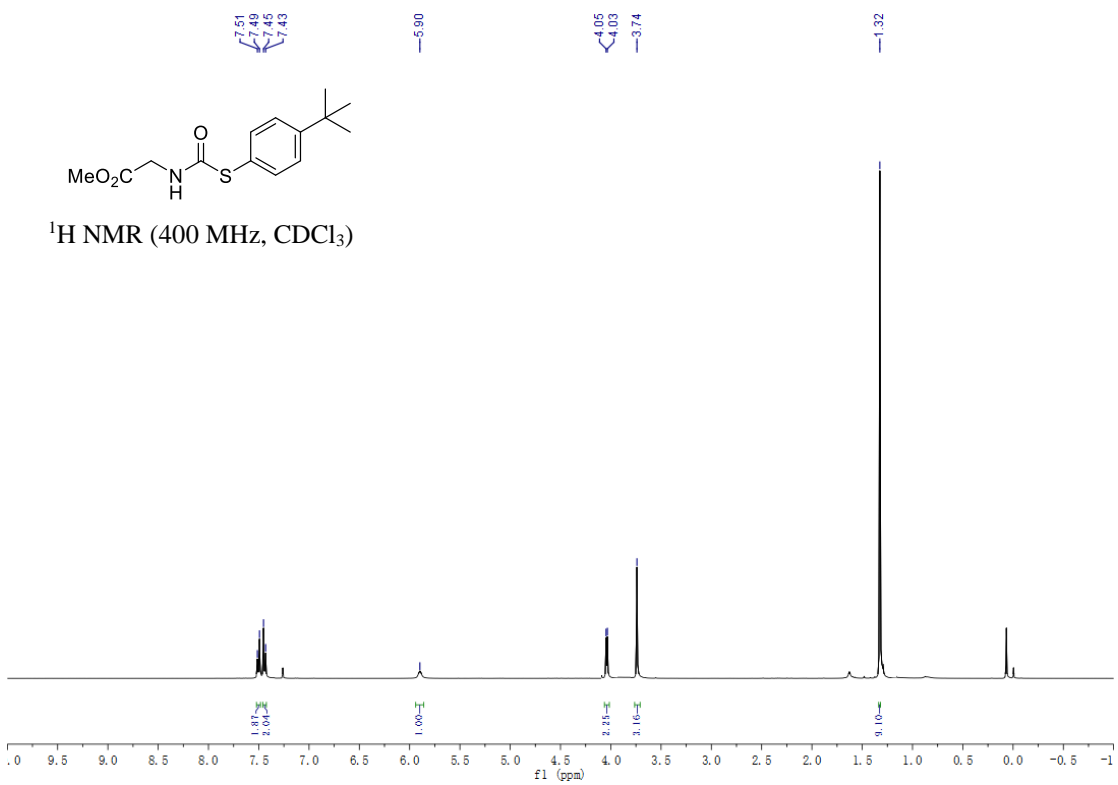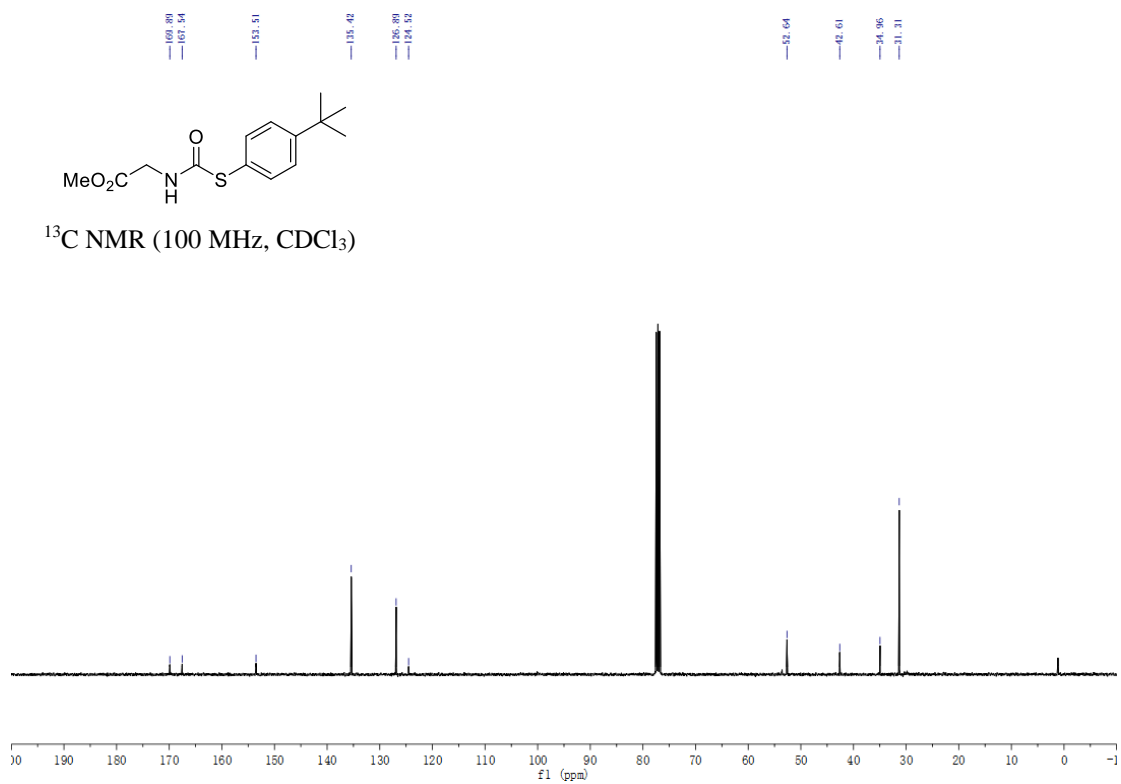

*S*-(4-(*tert*-butyl)phenyl) cyclohexylcarbamothioate (**3u**)

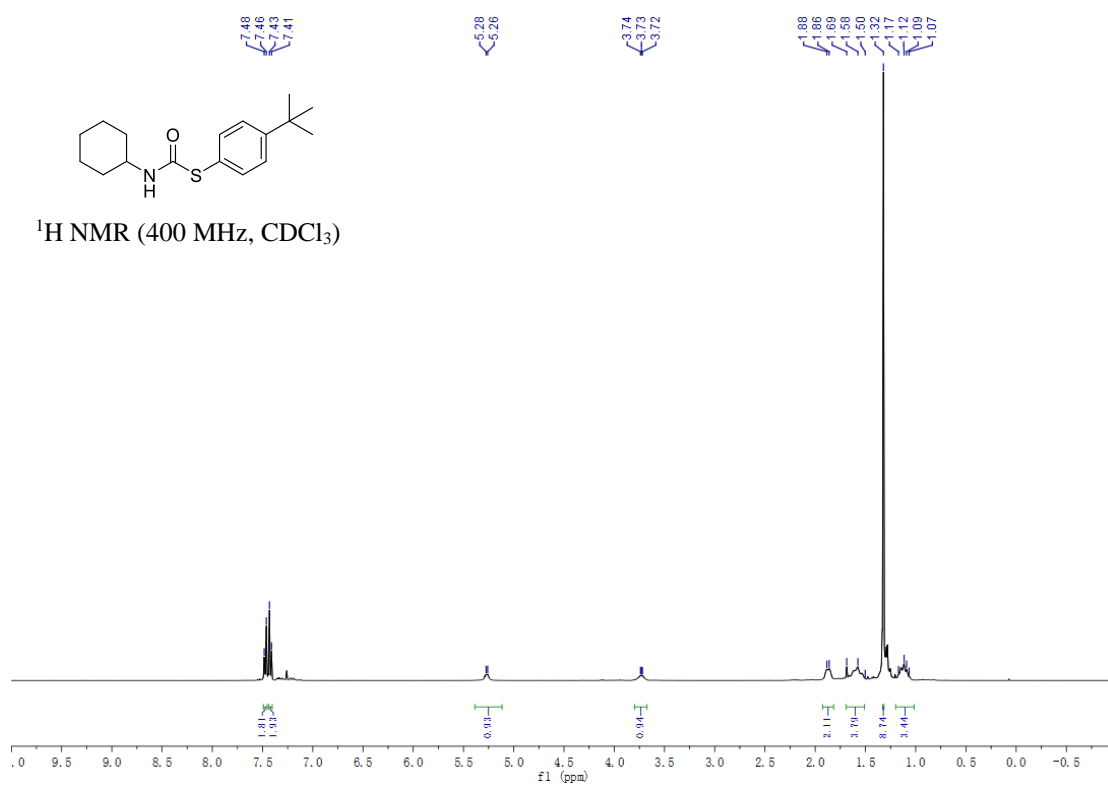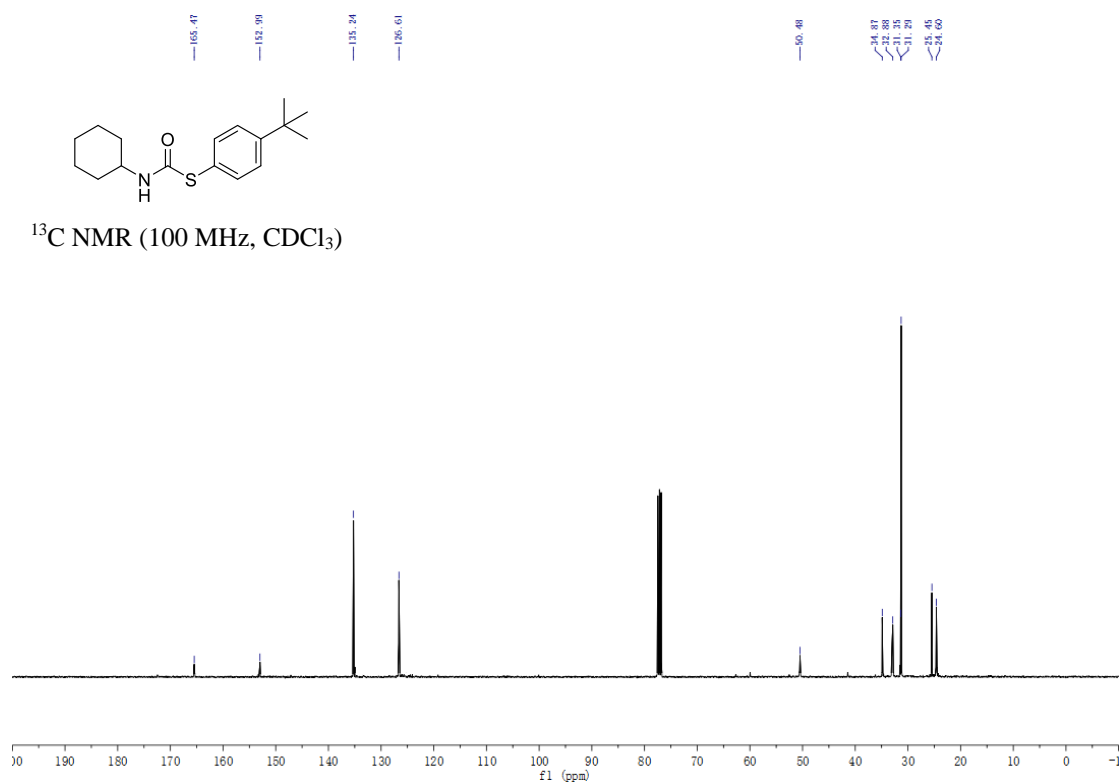

*S*-(4-(*tert*-butyl)phenyl) *tert*-butylcarbamothioate (**3v**)

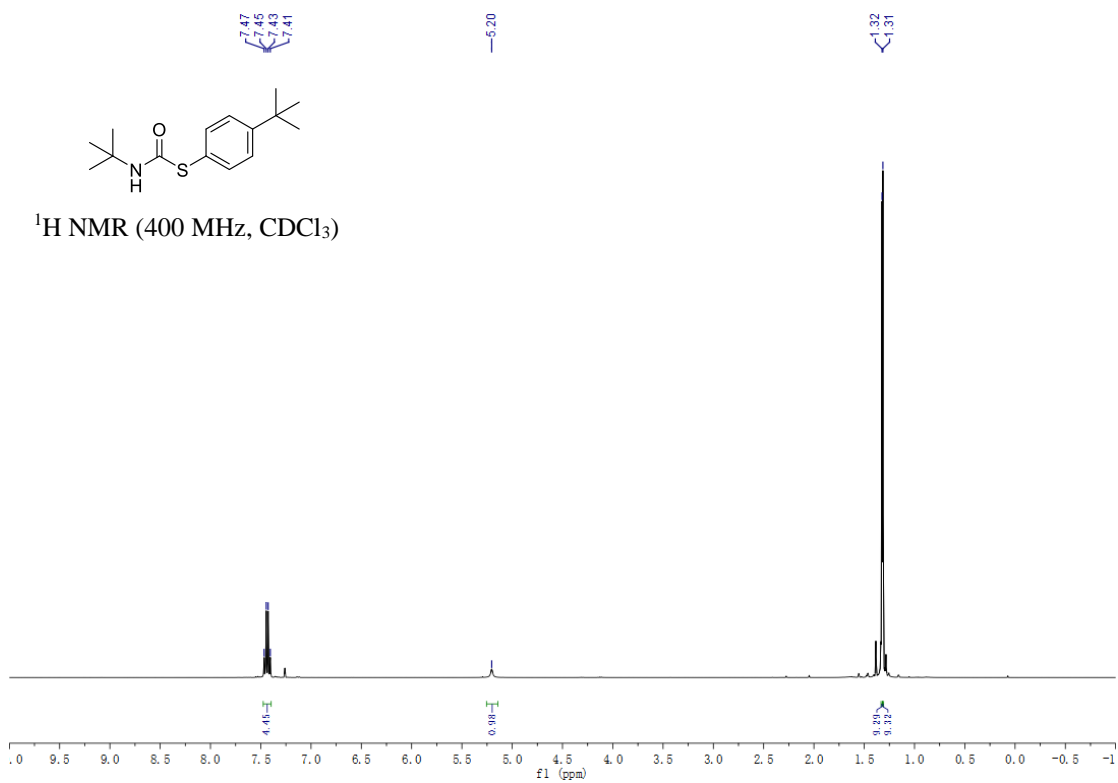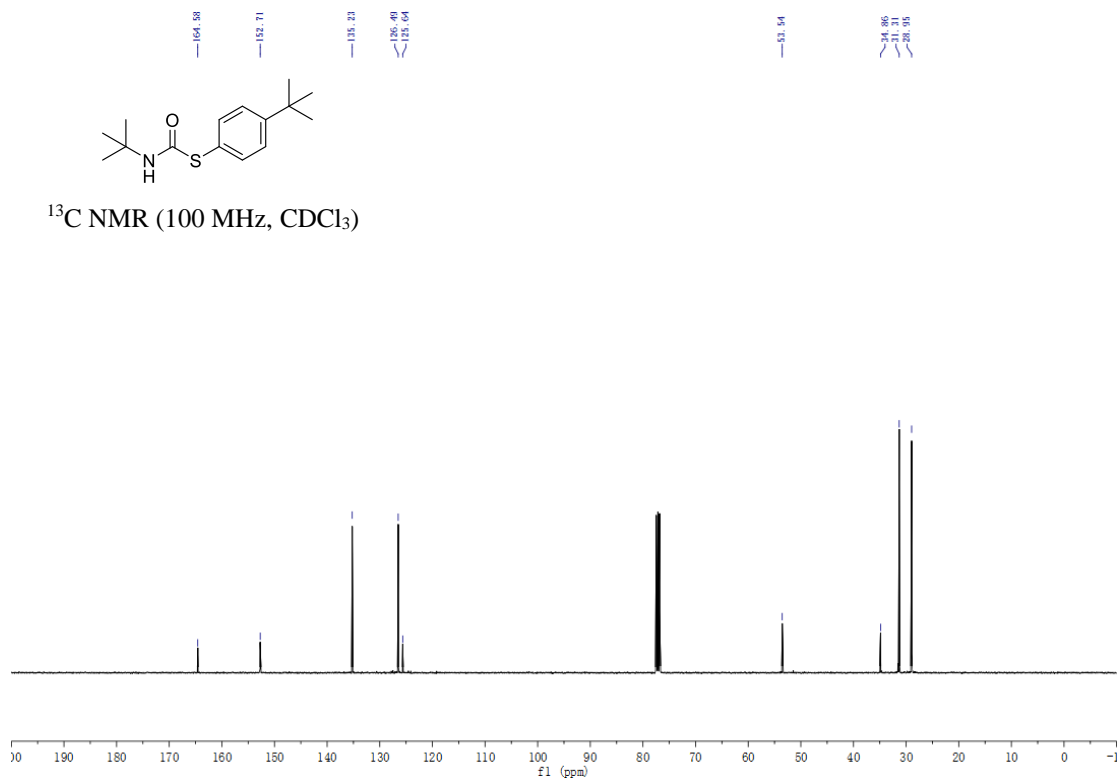

*S*-(4-(*tert*-butyl)phenyl) (2,4,4-trimethylpentan-2-yl)carbamothioate (**3w**)

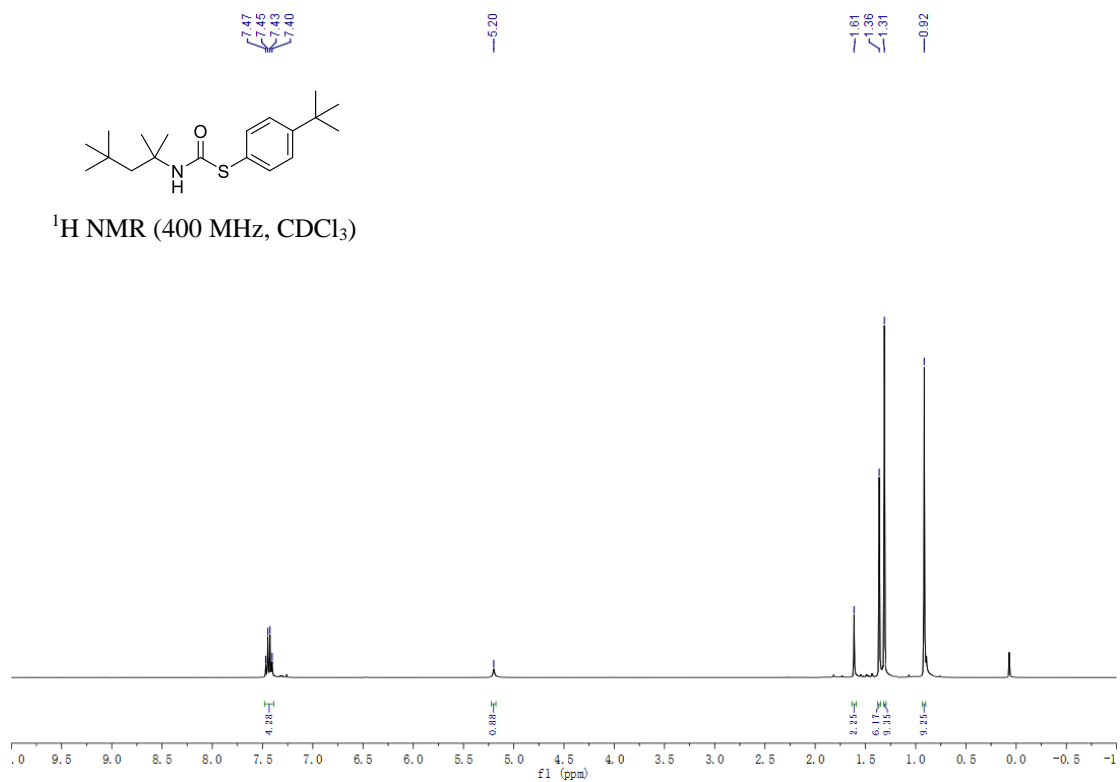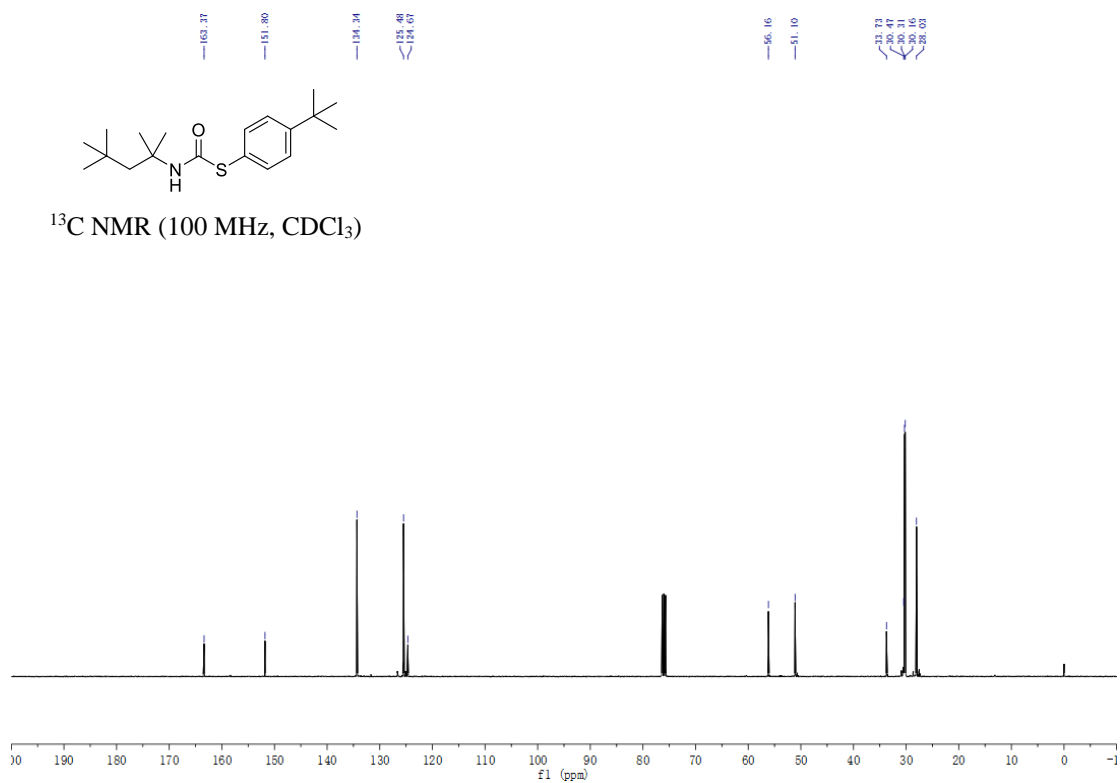

*S*-(4-(*tert*-butyl)phenyl) benzylcarbamothioate (3x)

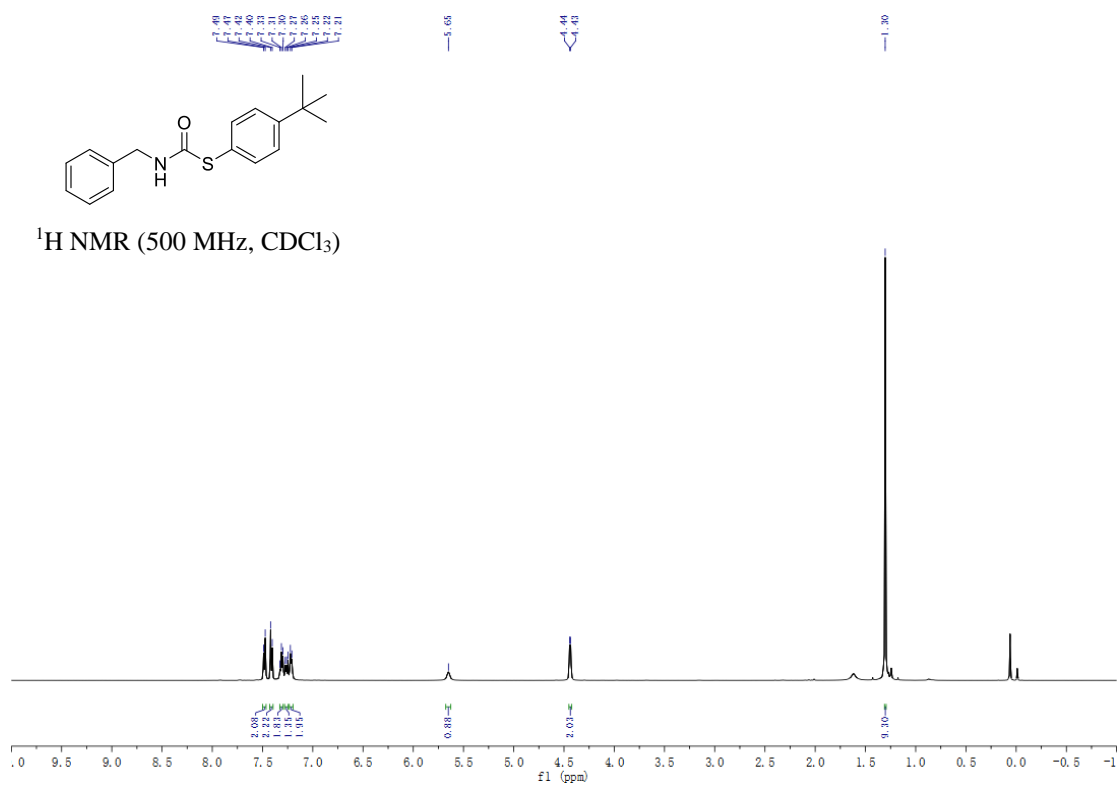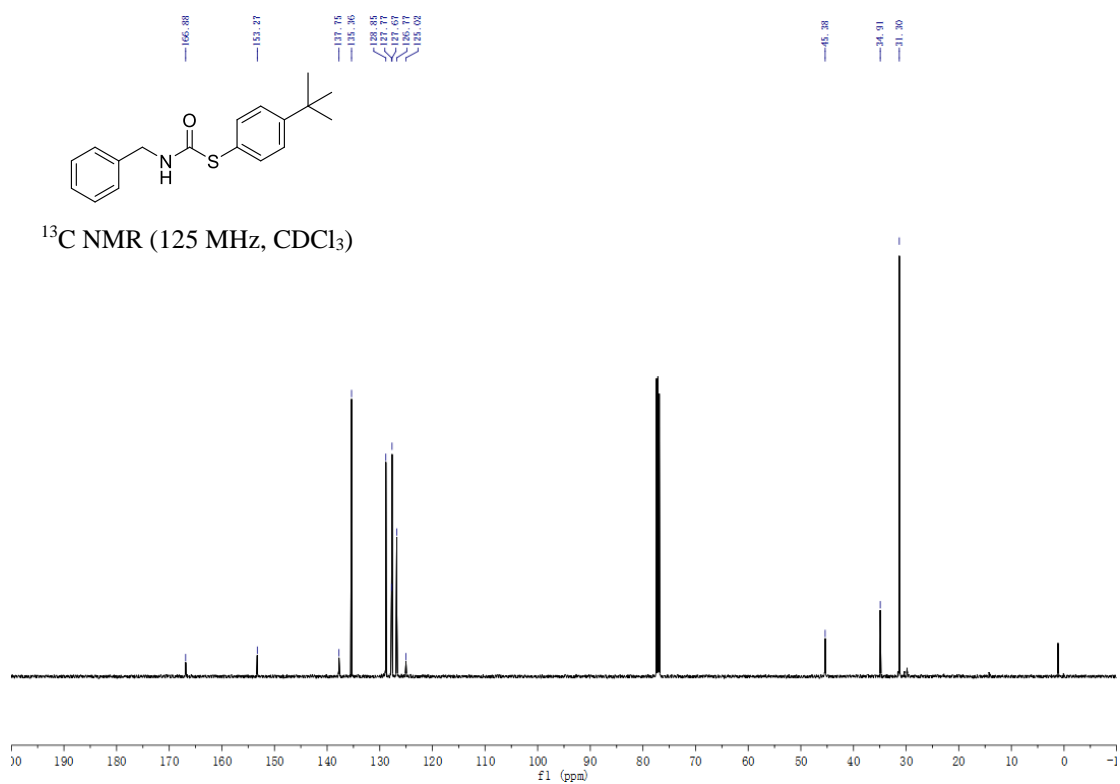

*S*-(4-(*tert*-butyl)phenyl) naphthalen-2-ylcarbamothioate (3y)

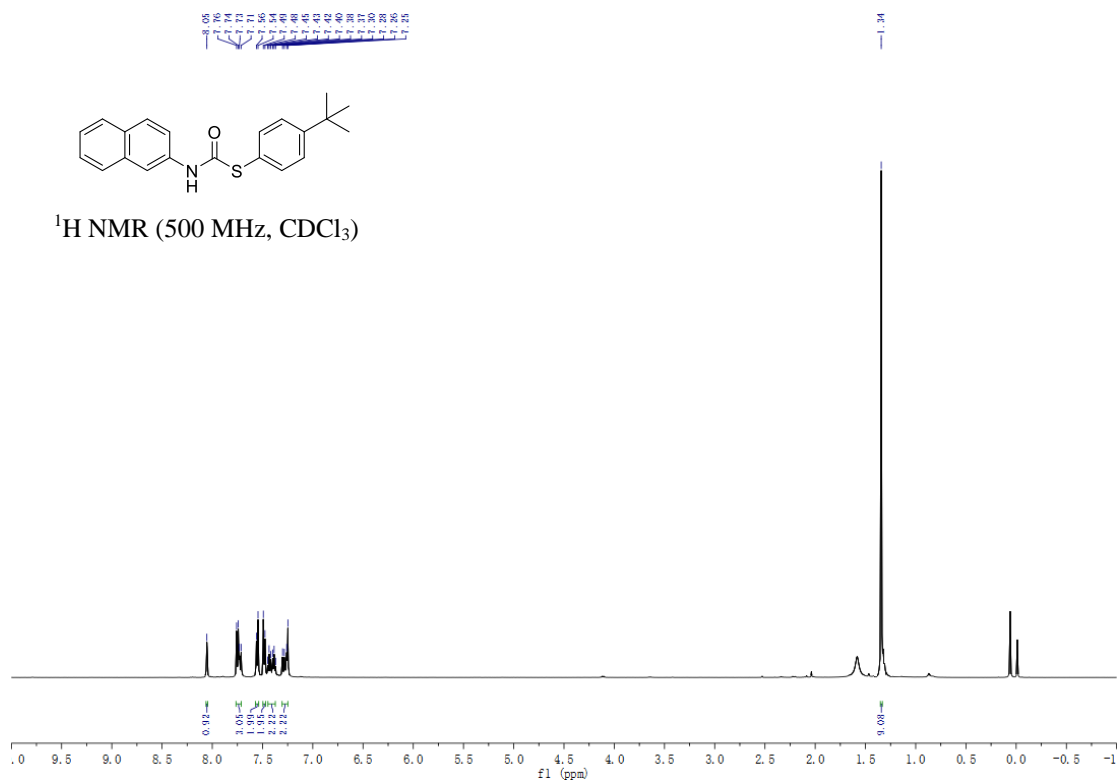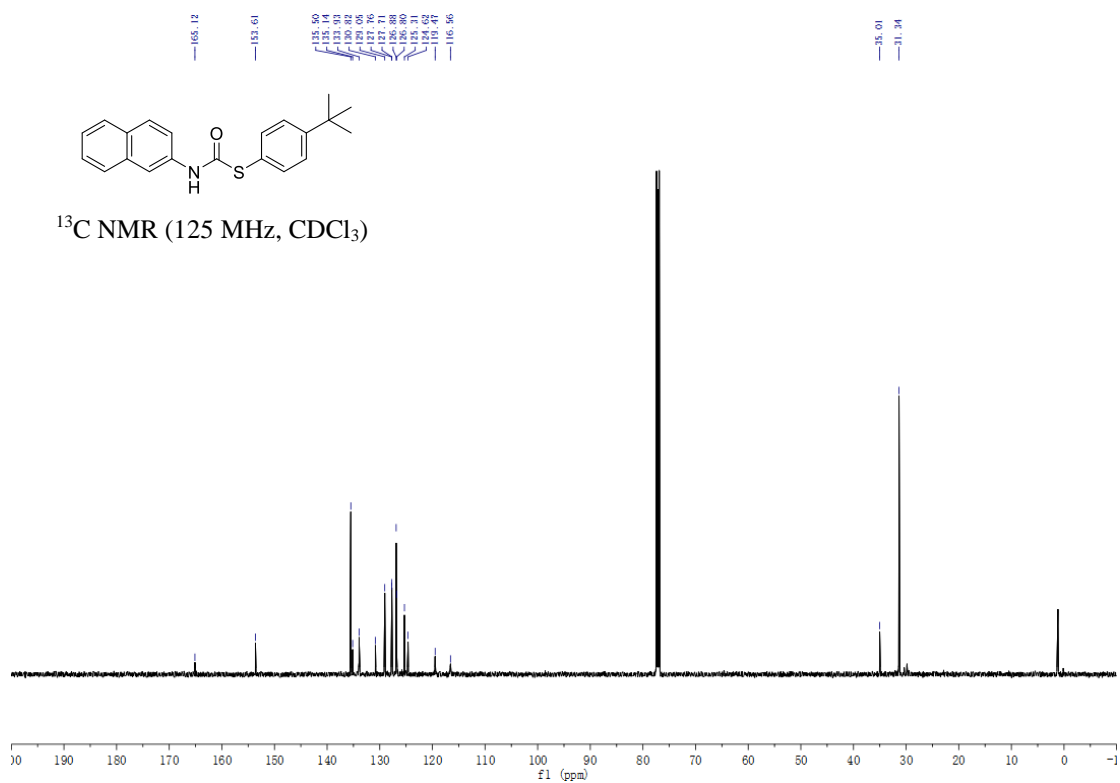

*ethyl 2-(2,4-dioxo-2H-benzo[e][1,3]thiazin-3(4H)-yl)acetate (7)*

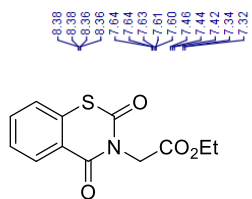

$^1\text{H}$  NMR (400 MHz,  $\text{CDCl}_3$ )

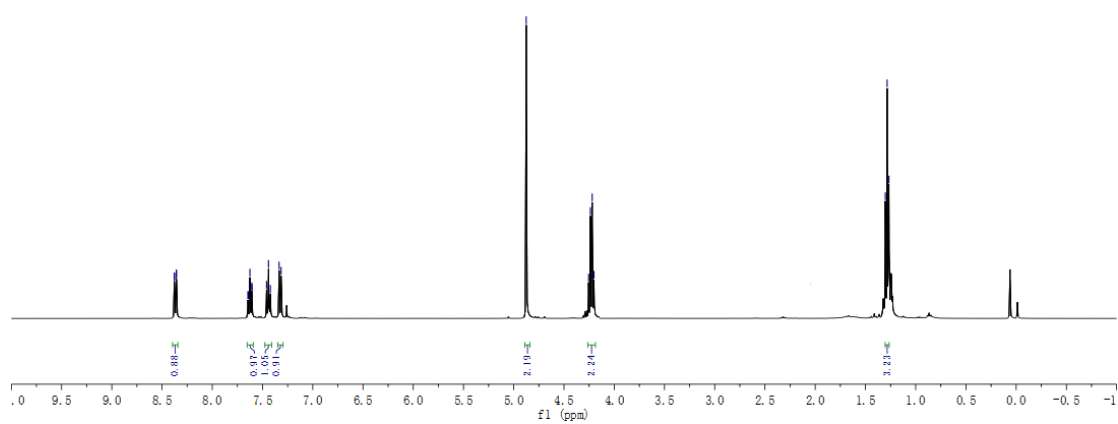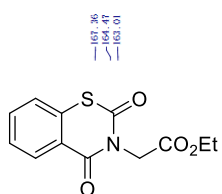

$^{13}\text{C}$  NMR (100 MHz,  $\text{CDCl}_3$ )

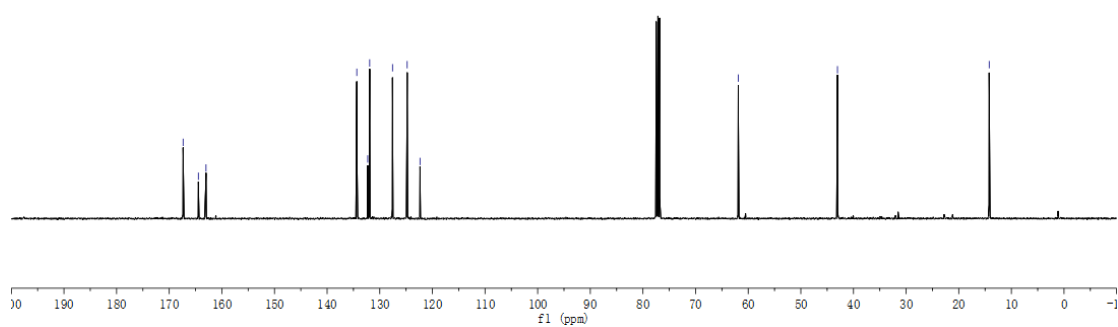



**1-(((4-(tert-butyl)phenyl)thio)oxy)-2,2,6,6-tetramethylpiperidine (8)**

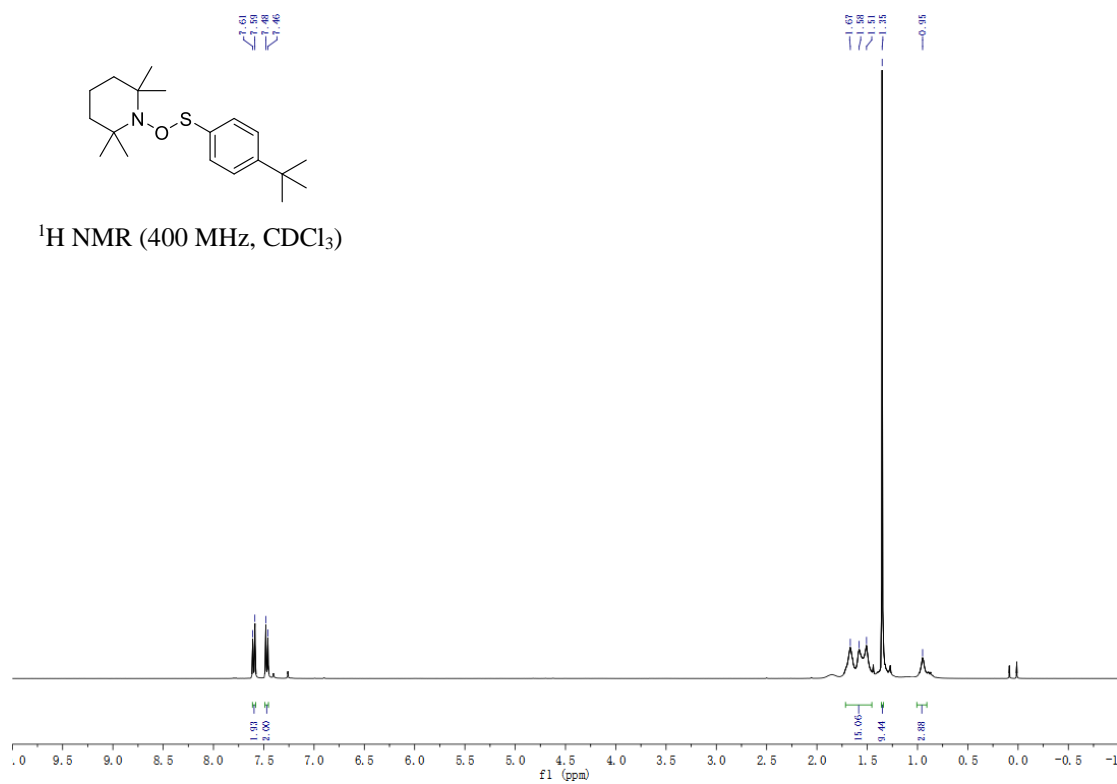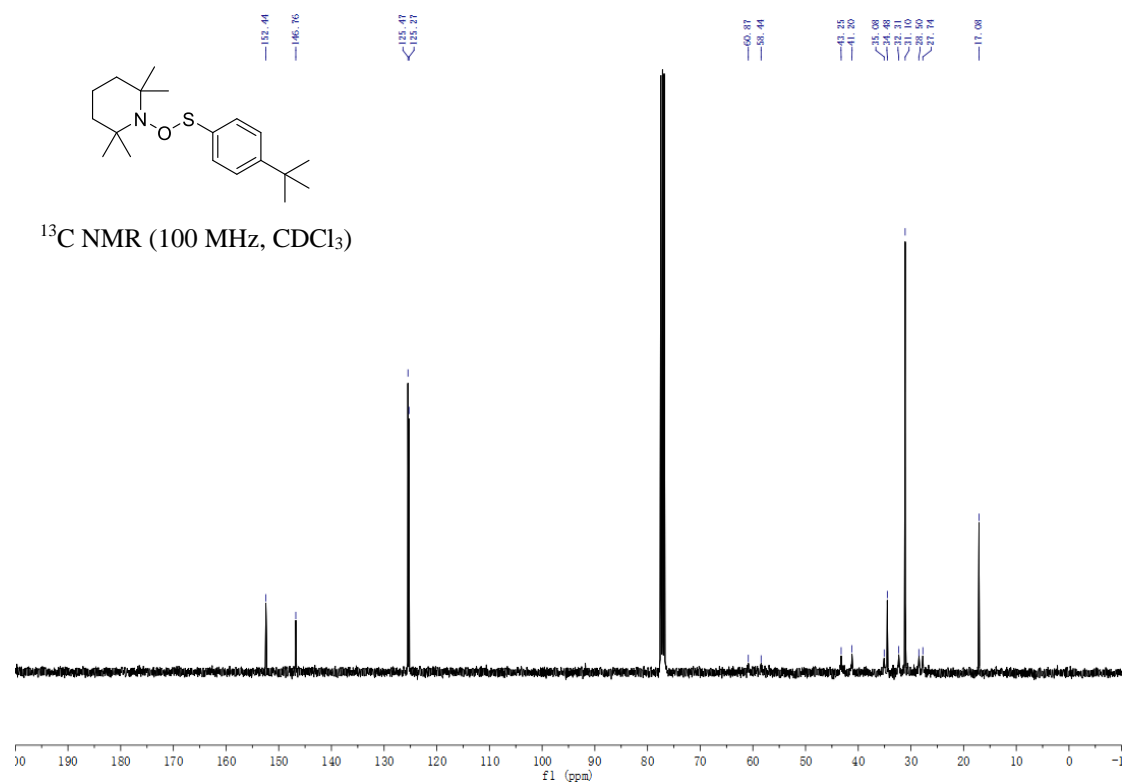

Supplement: d1cc05399j1.pdf [file d1cc05399j1.pdf]
